# Supplementary material for: Regioselective Pd-catalyzed α-alkylation of furans using alkyl iodides
Source: Royal Society of Chemistry journal article supplement (doi:10.1039/d1ra01522b), 2021-01-01

## Supporting Information

### A Regioselective Pd-catalyzed $\alpha$ -Alkylation of Furans Using Alkyl Iodides

Jiaqi Yuan,<sup>ab</sup> Xiaofei Zhang<sup>\*a</sup> and Chunhao Yang<sup>\*ab</sup>

<sup>a</sup>State Key Laboratory of Drug Research, Shanghai Institute of Materia Medica, Chinese Academy of Sciences, 555 Zu Chong Zhi Road, Shanghai 201203, China

<sup>b</sup>School of Pharmacy, University of Chinese Academy of Sciences, No. 19A Yuquan Road, Beijing 100049, China.

\*E-mail: [chyang@simm.ac.cn](mailto:chyang@simm.ac.cn)(C.Yang); [xiaofeizhang@simm.ac.cn](mailto:xiaofeizhang@simm.ac.cn)(X. Zhang) .

### Table of Contents

|     |                                                      |   |
|-----|------------------------------------------------------|---|
| I.  | General experimental procedures.....                 | 2 |
| II. | <sup>1</sup> H and <sup>13</sup> C NMR spectra ..... | 3 |

## I. General experimental procedures

Compound **2y** was reported compound and synthesized according to the literature procedure (*Angew. Chem. Int. Ed.* **2014**, *53*, 13573-13577).





### <sup>1</sup>H NMR of compound 3c

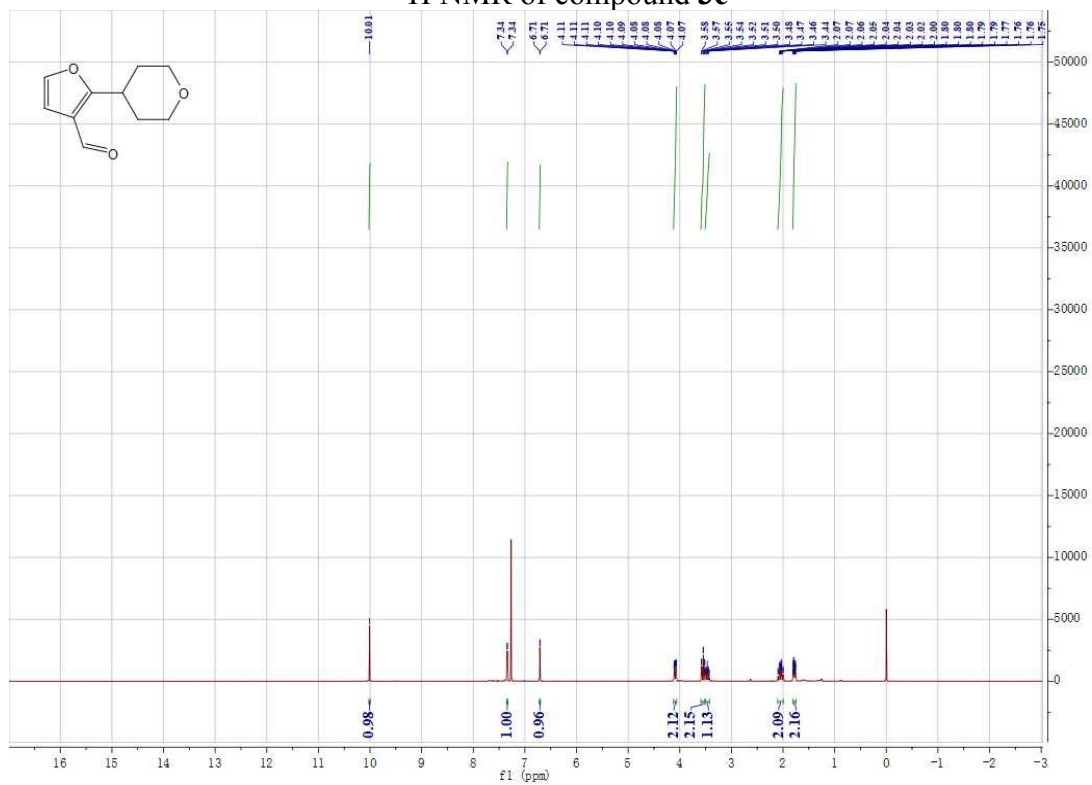

### <sup>13</sup>C NMR of compound 3c

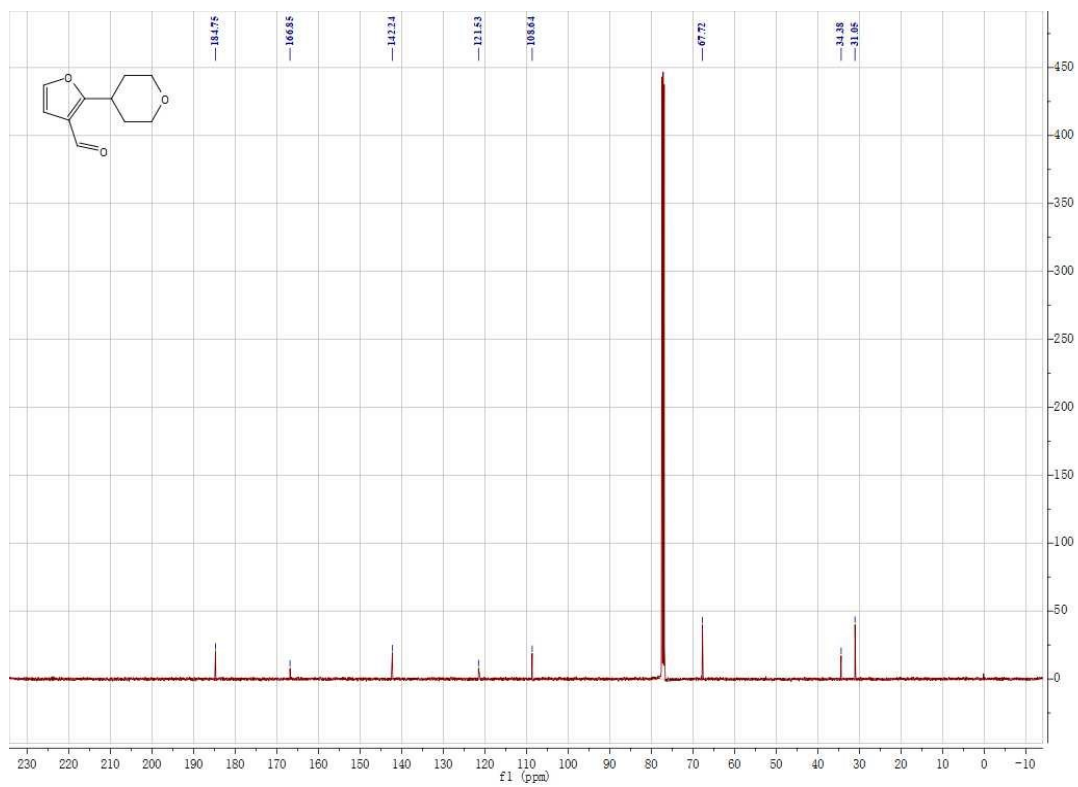



### $^1\text{H}$ NMR of compound **3e**

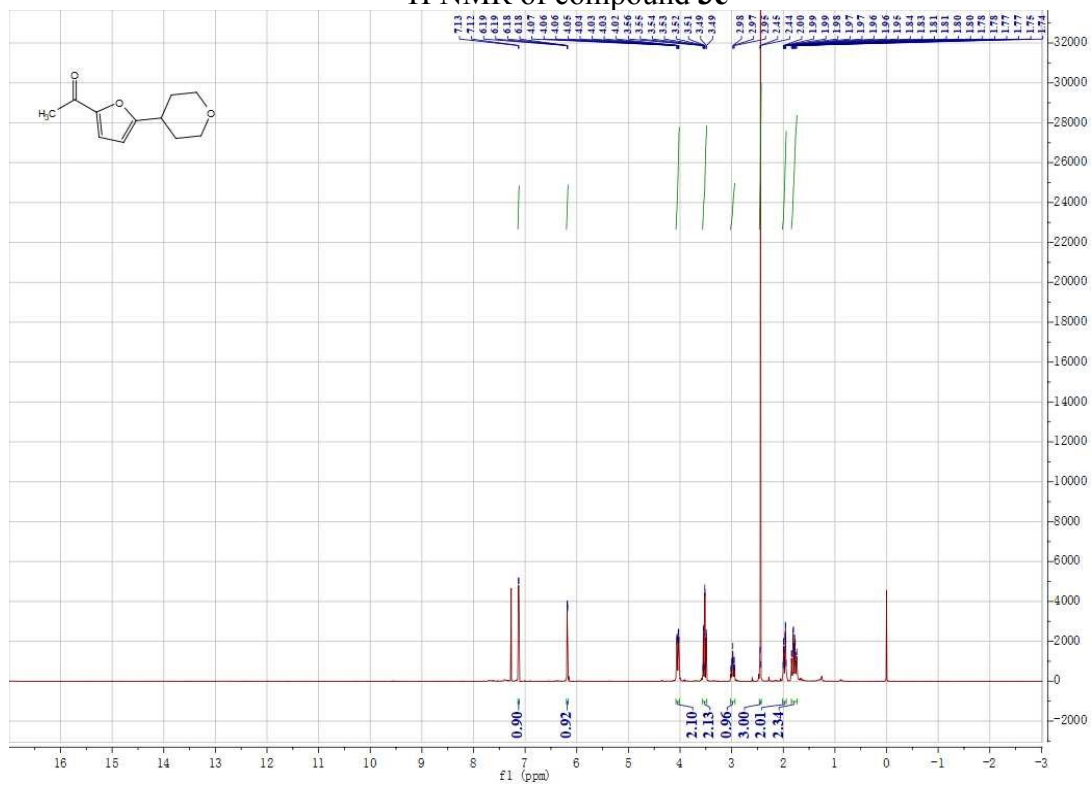

### $^{13}\text{C}$ NMR of compound **3e**

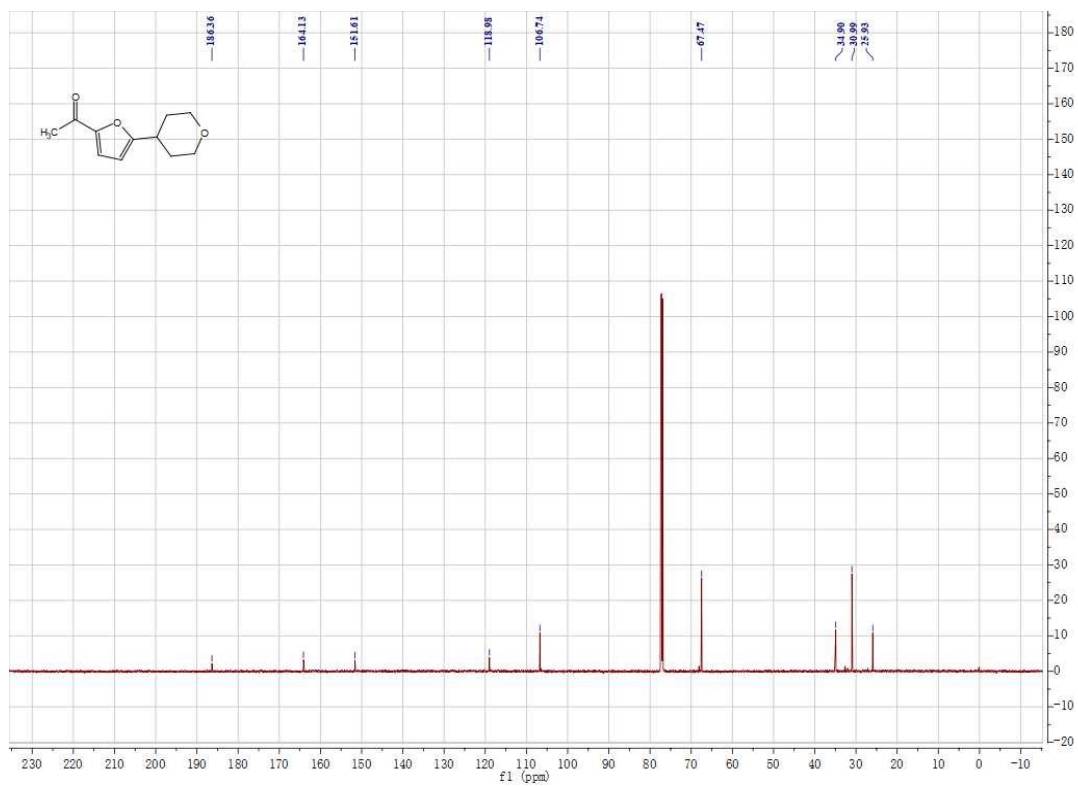

### $^1\text{H}$ NMR of compound **3f**

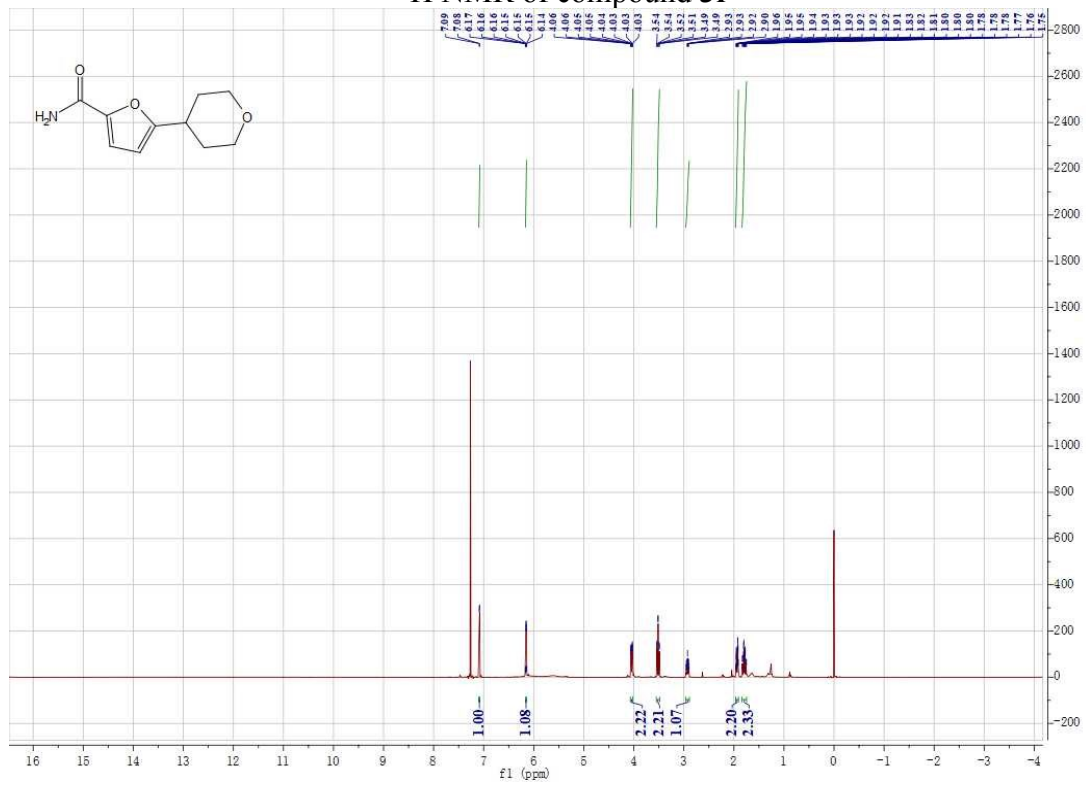

### $^{13}\text{C}$ NMR of compound **3f**

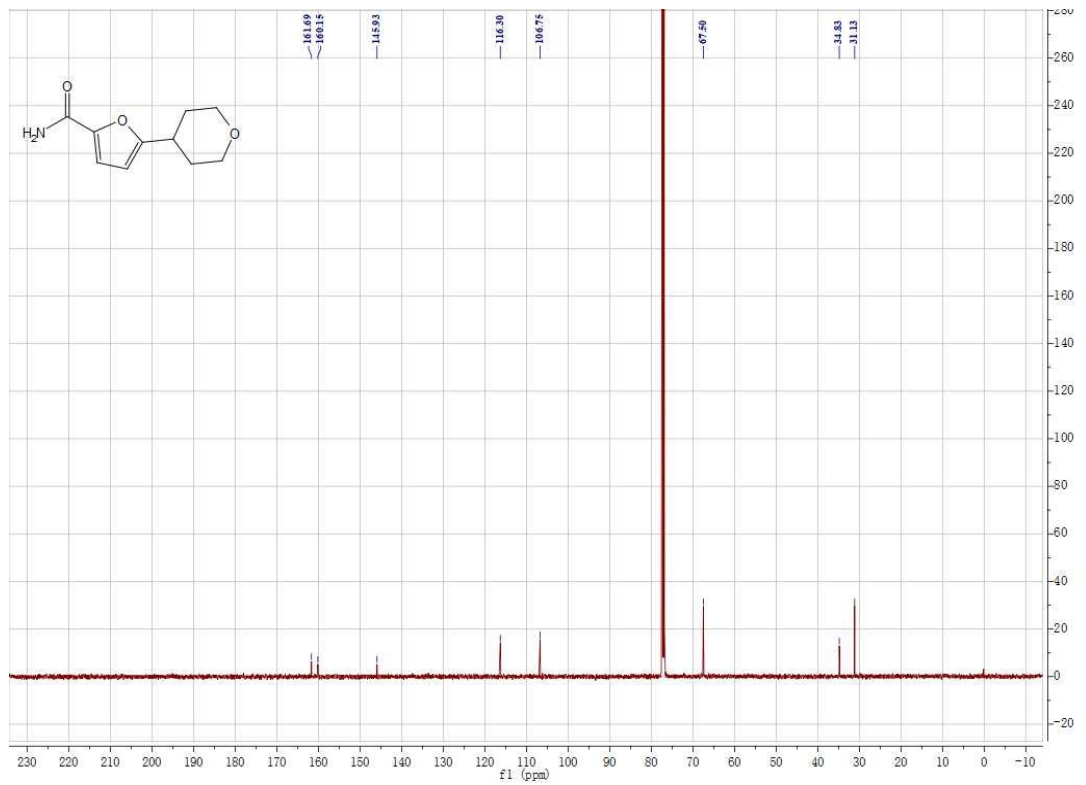



### <sup>1</sup>H NMR of compound **3g**

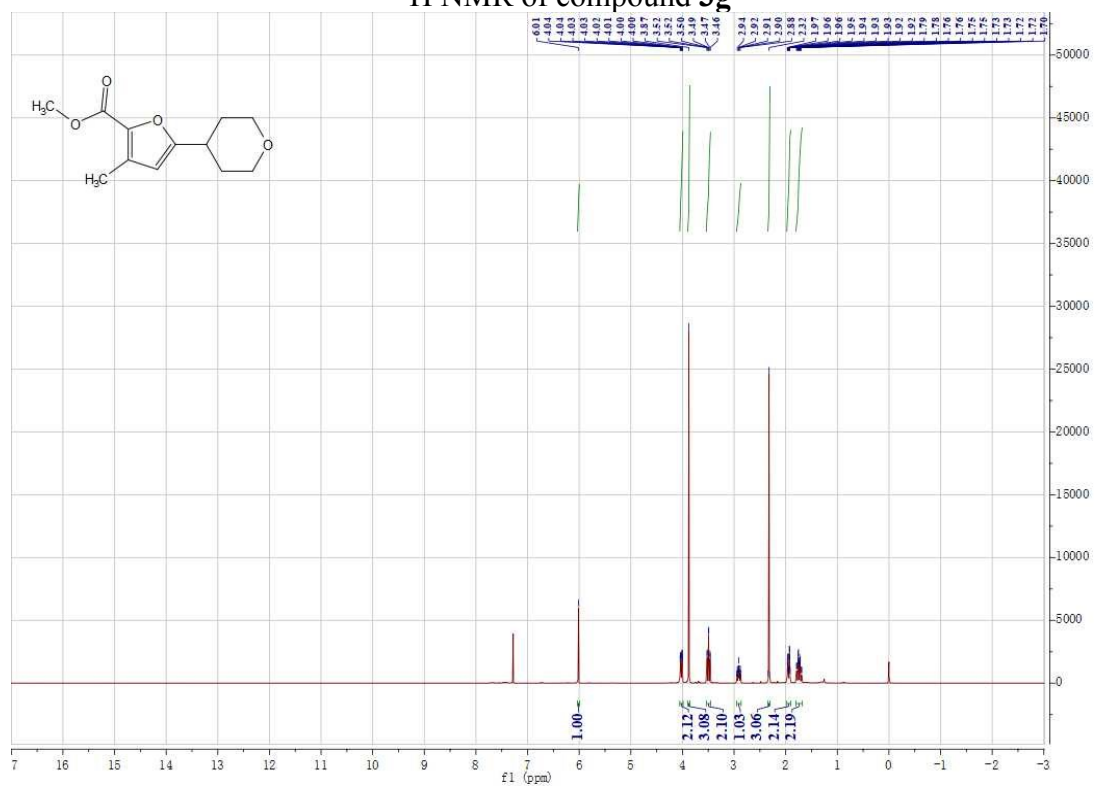

### <sup>13</sup>C NMR of compound **3g**

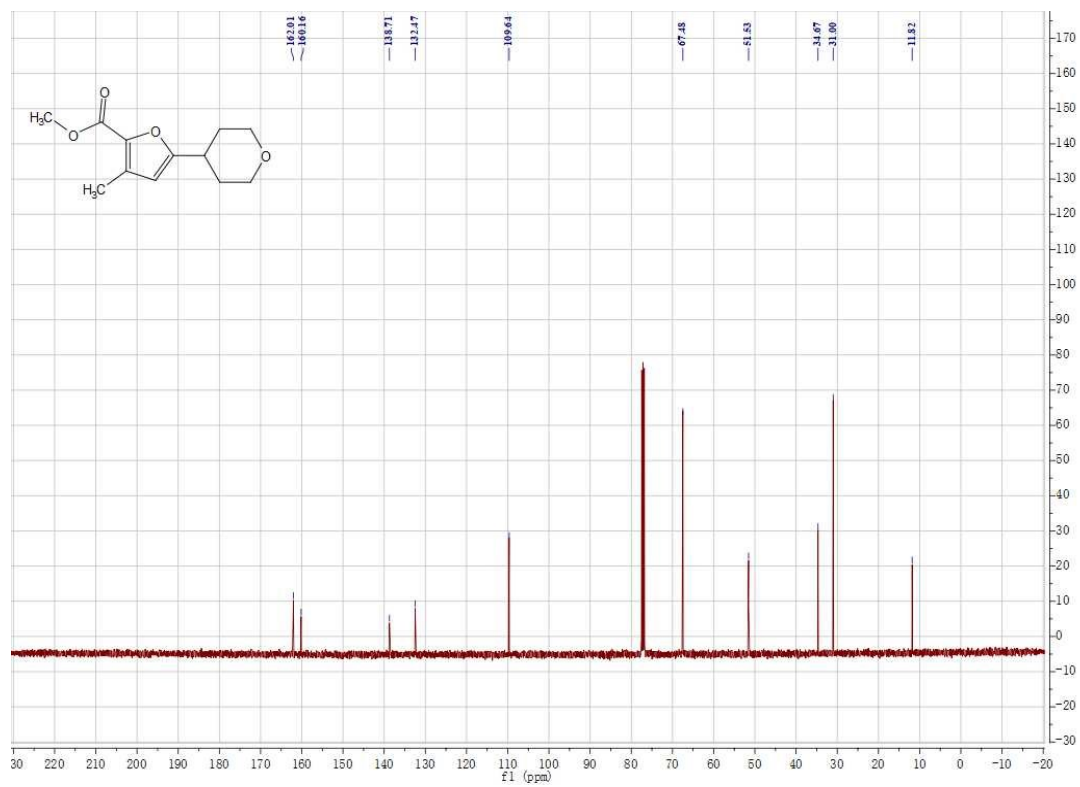

### <sup>1</sup>H NMR of compound 3h

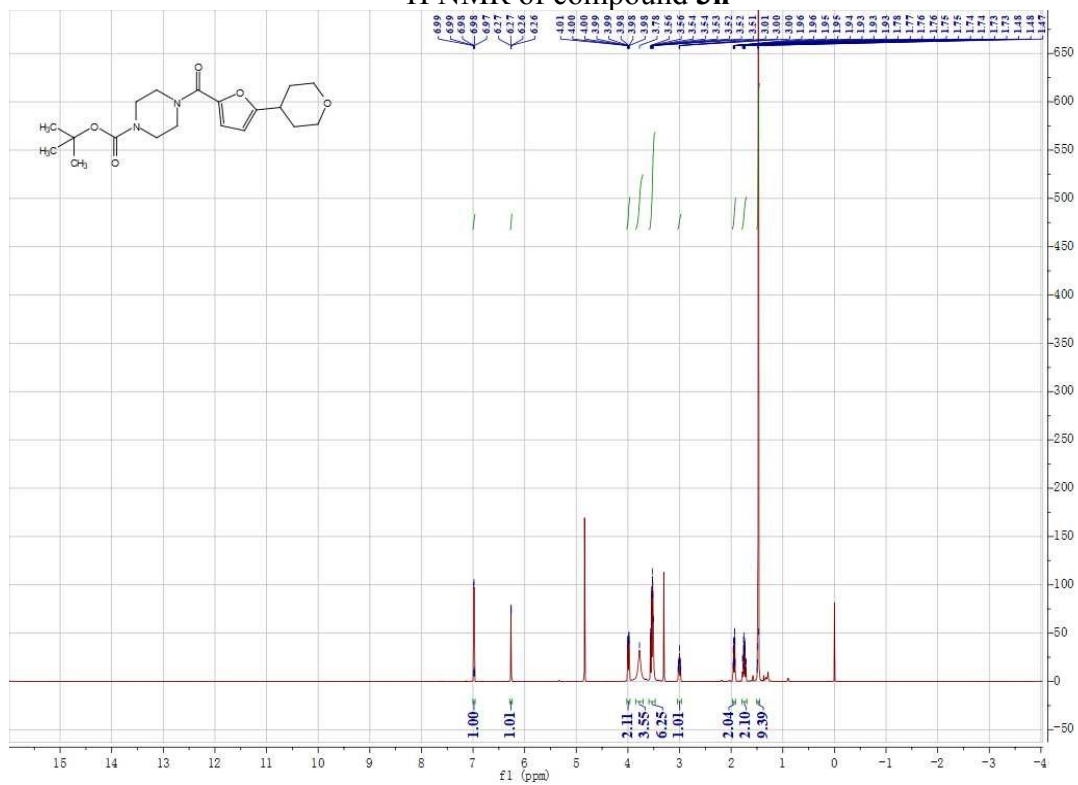

### <sup>13</sup>C NMR of compound 3h

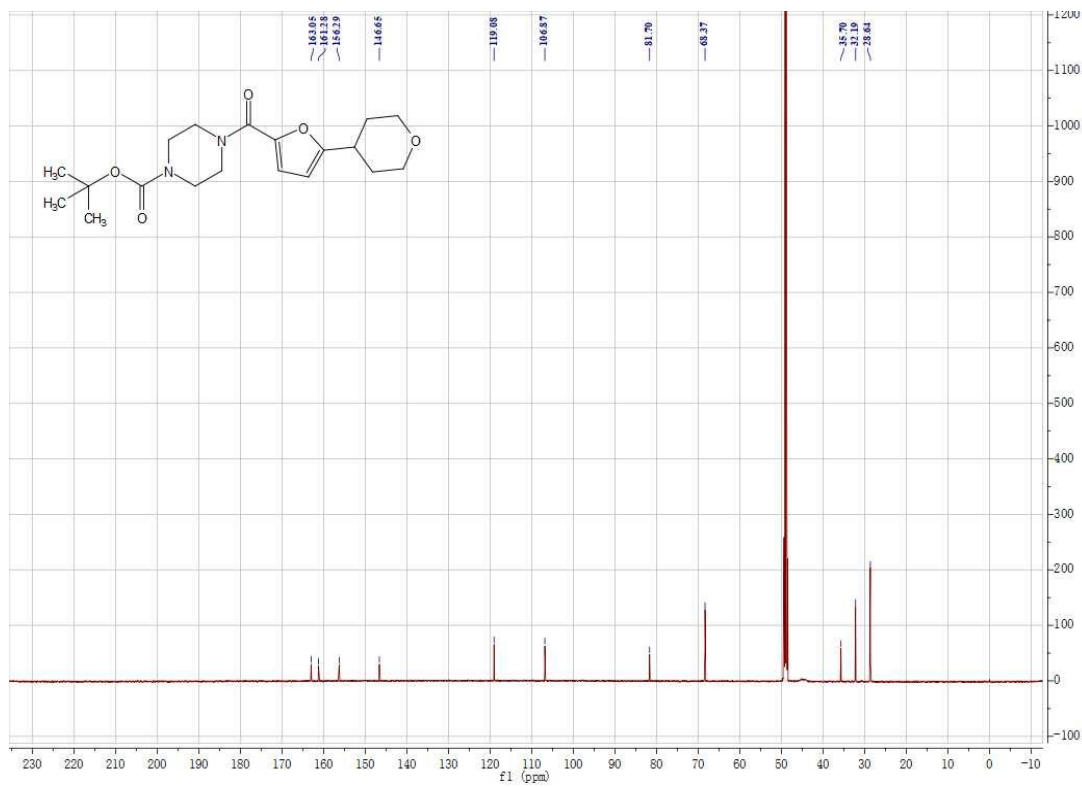

### <sup>1</sup>H NMR of compound 3i

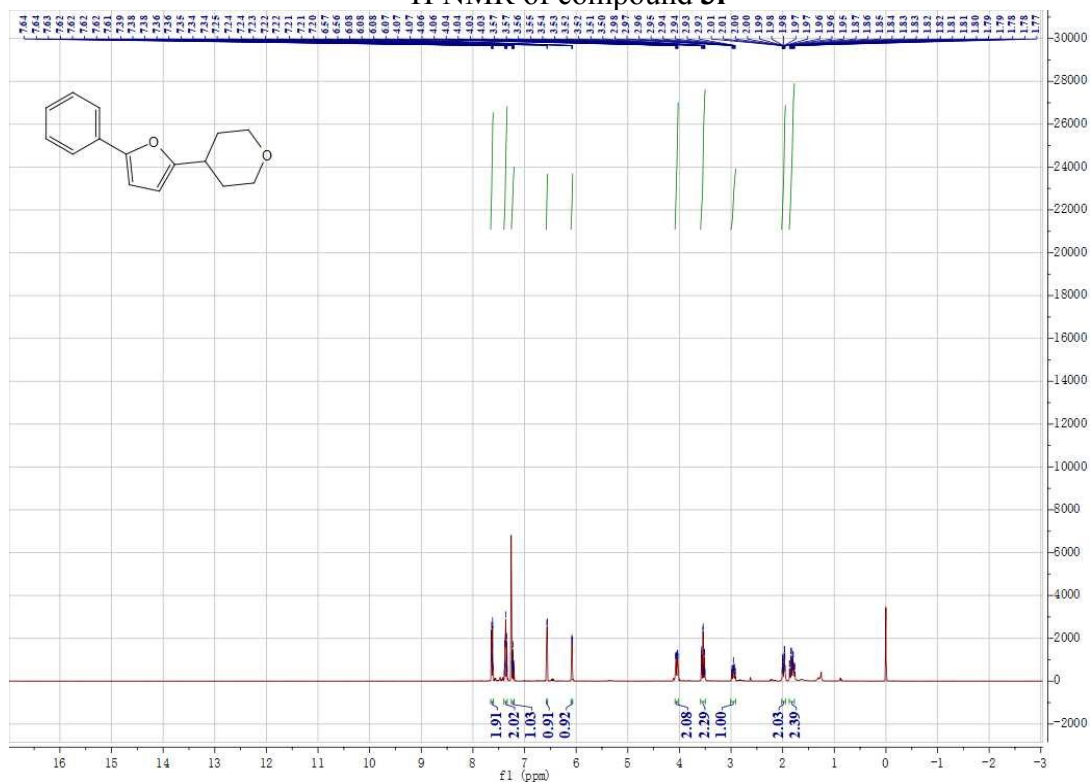

### <sup>13</sup>C NMR of compound 3i

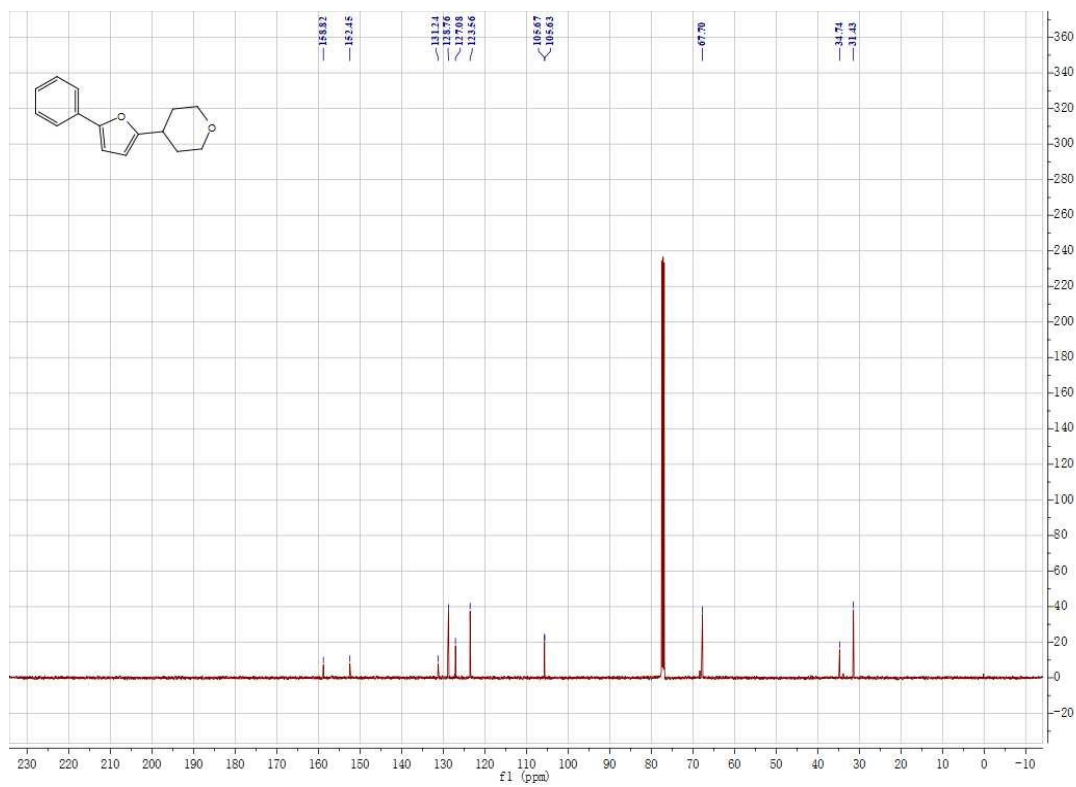

### <sup>1</sup>H NMR of compound 3j

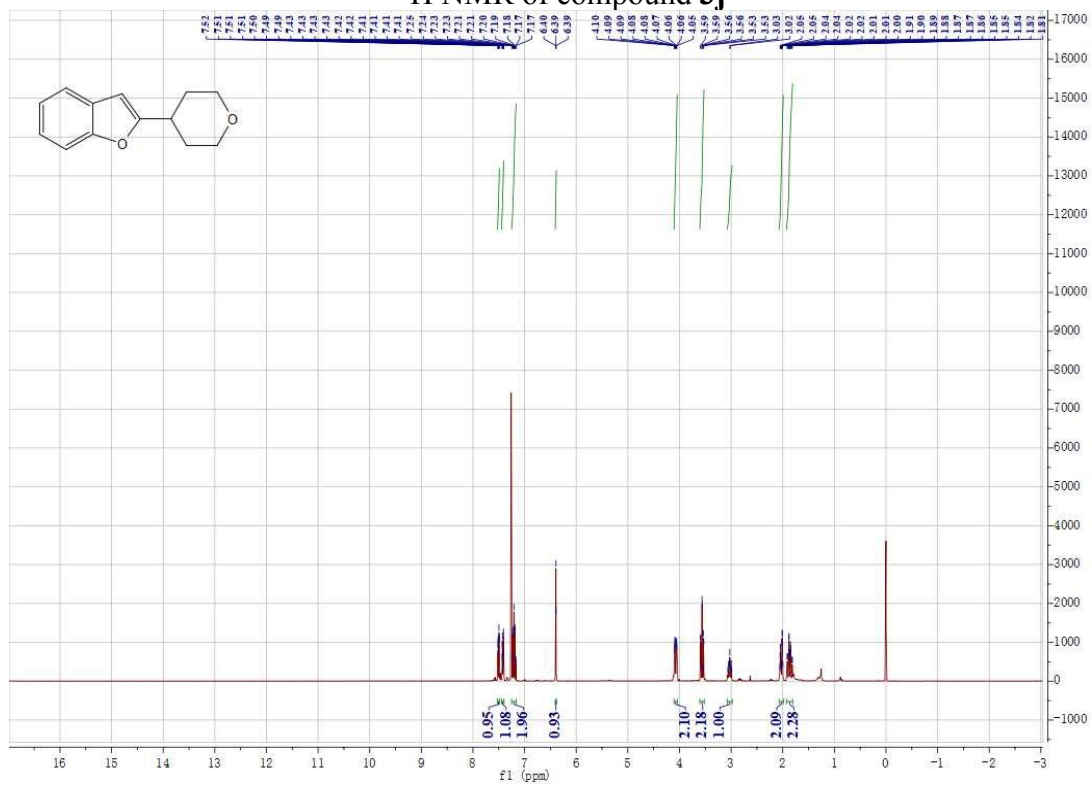

### <sup>13</sup>C NMR of compound 3j

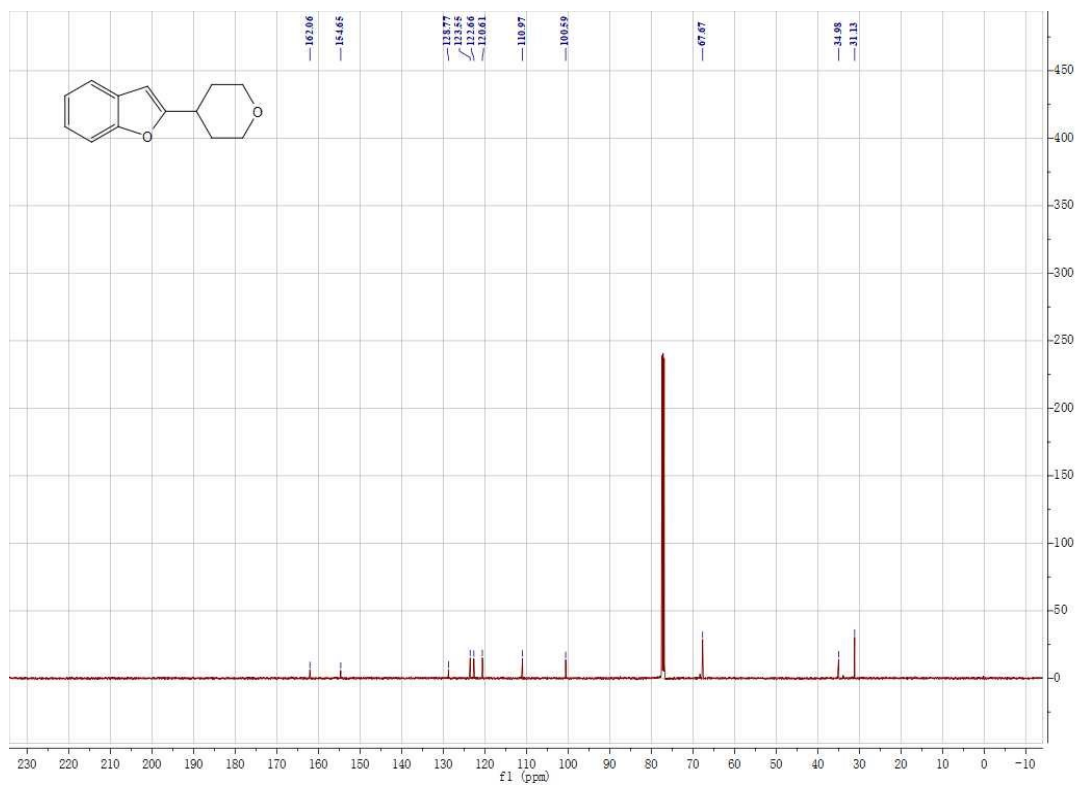

### <sup>1</sup>H NMR of compound 3k

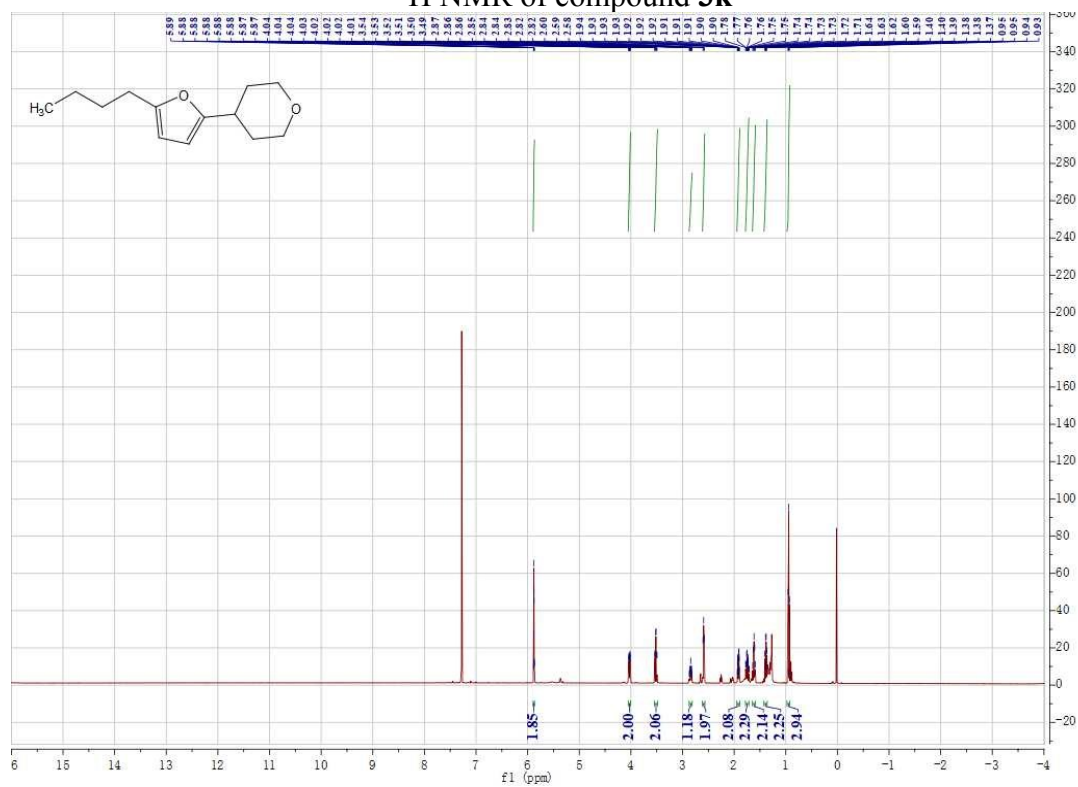

### <sup>13</sup>C NMR of compound 3k

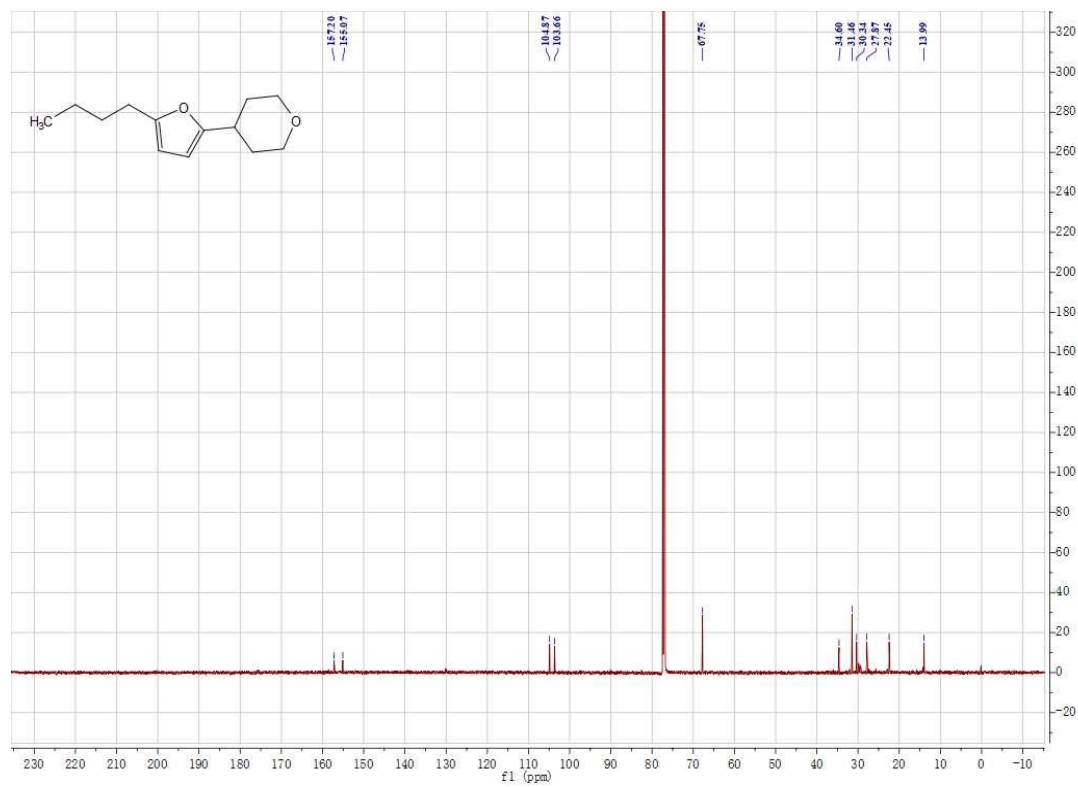

### <sup>1</sup>H NMR of compound 31

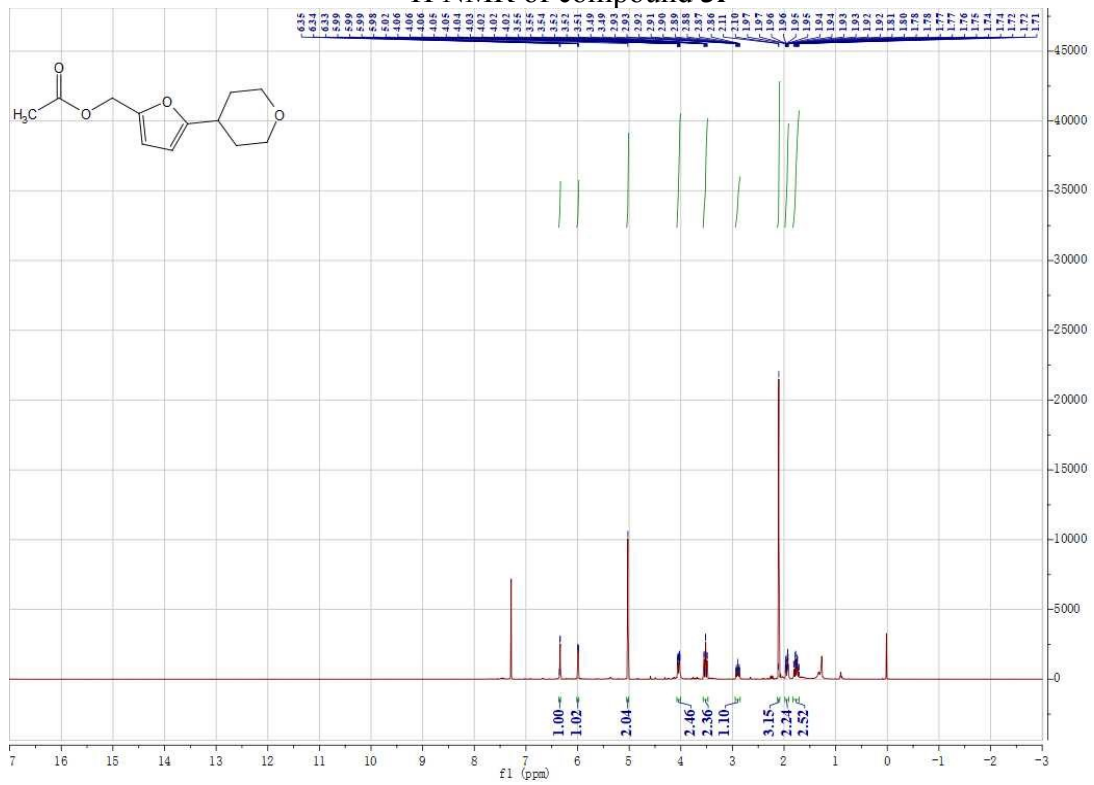

### <sup>13</sup>C NMR of compound 31

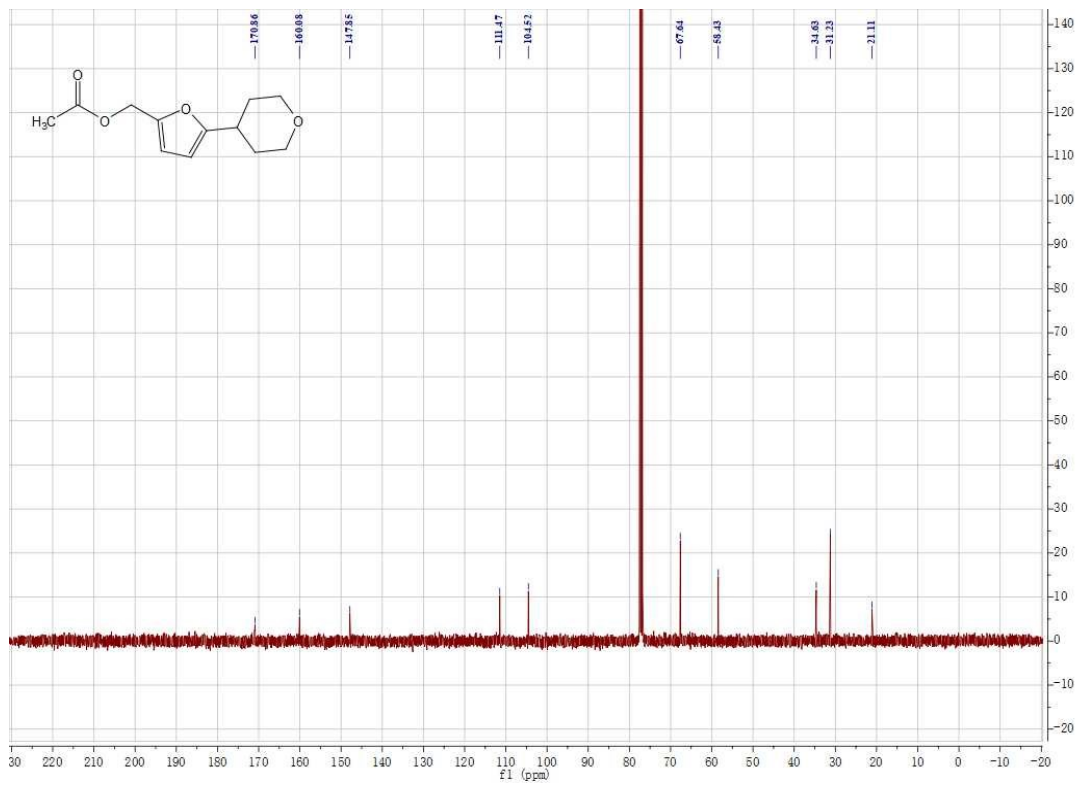

### <sup>1</sup>H NMR of compound **3m**

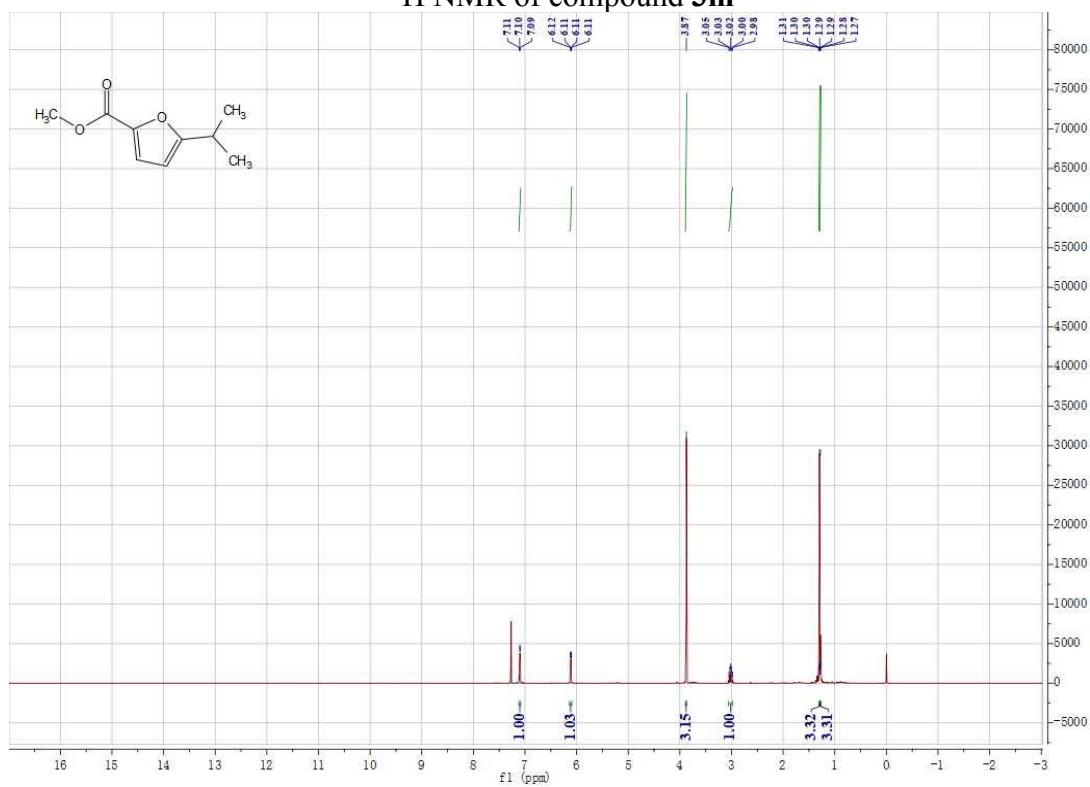

### <sup>13</sup>C NMR of compound **3m**

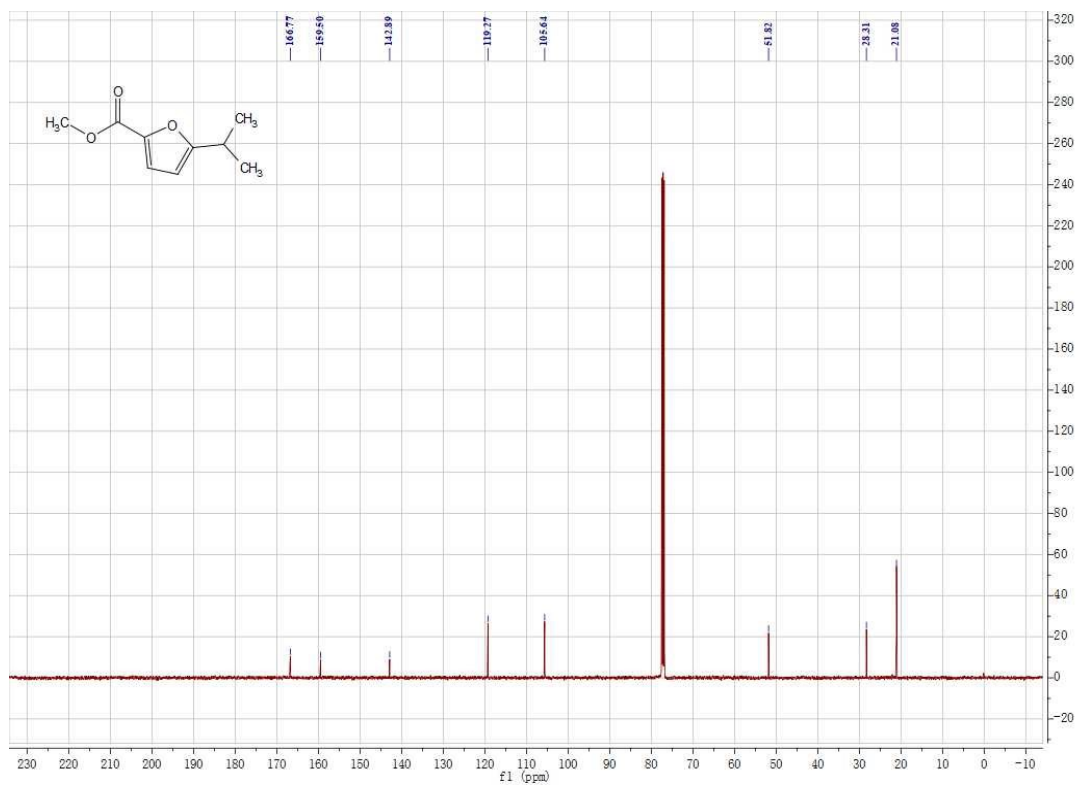

### <sup>1</sup>H NMR of compound **3n**

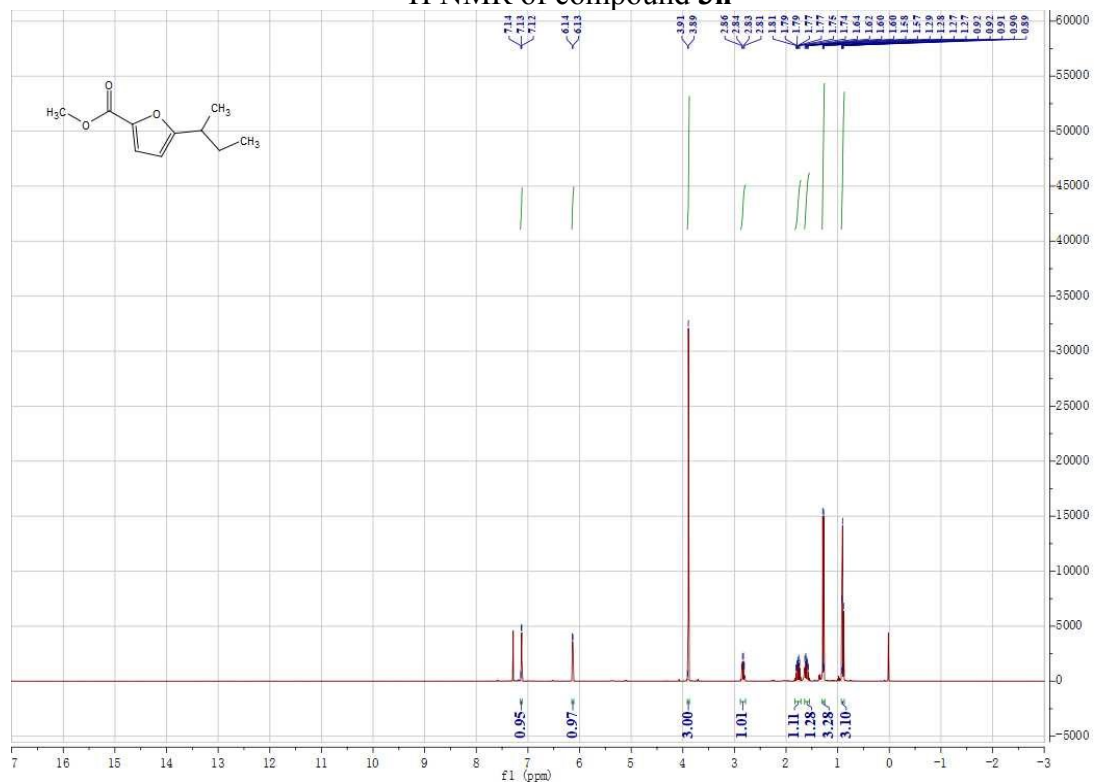

### <sup>13</sup>C NMR of compound **3n**

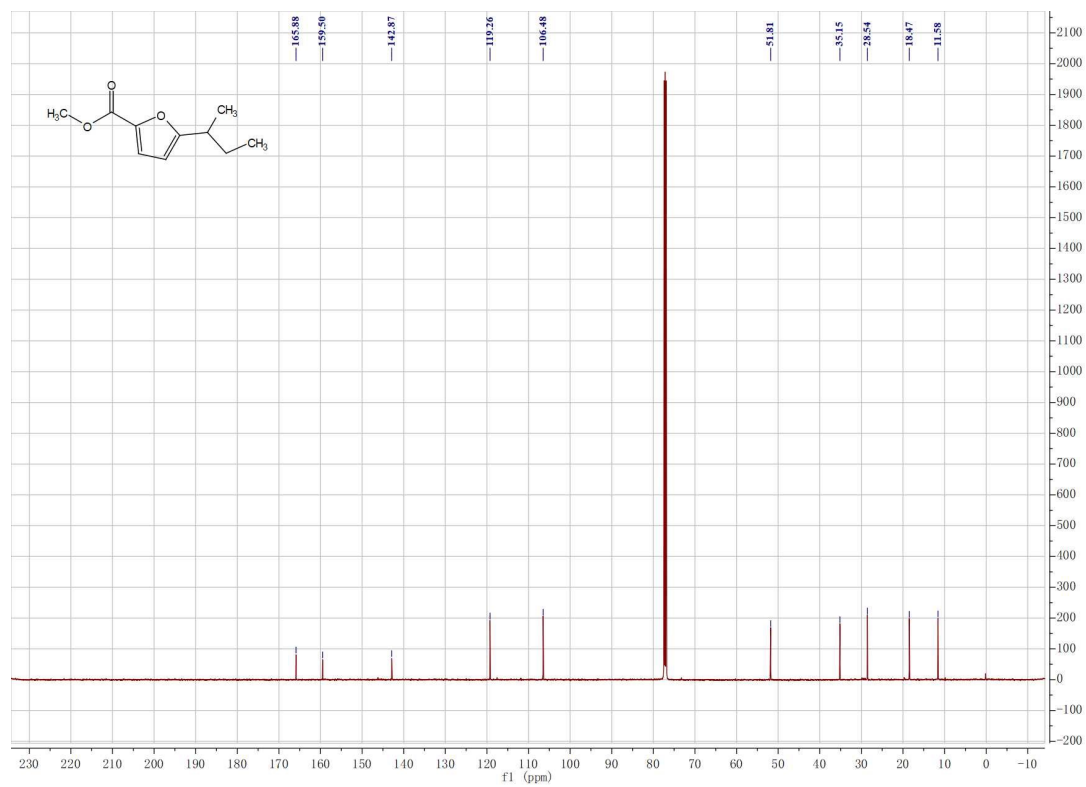



### <sup>1</sup>H NMR of compound **30**

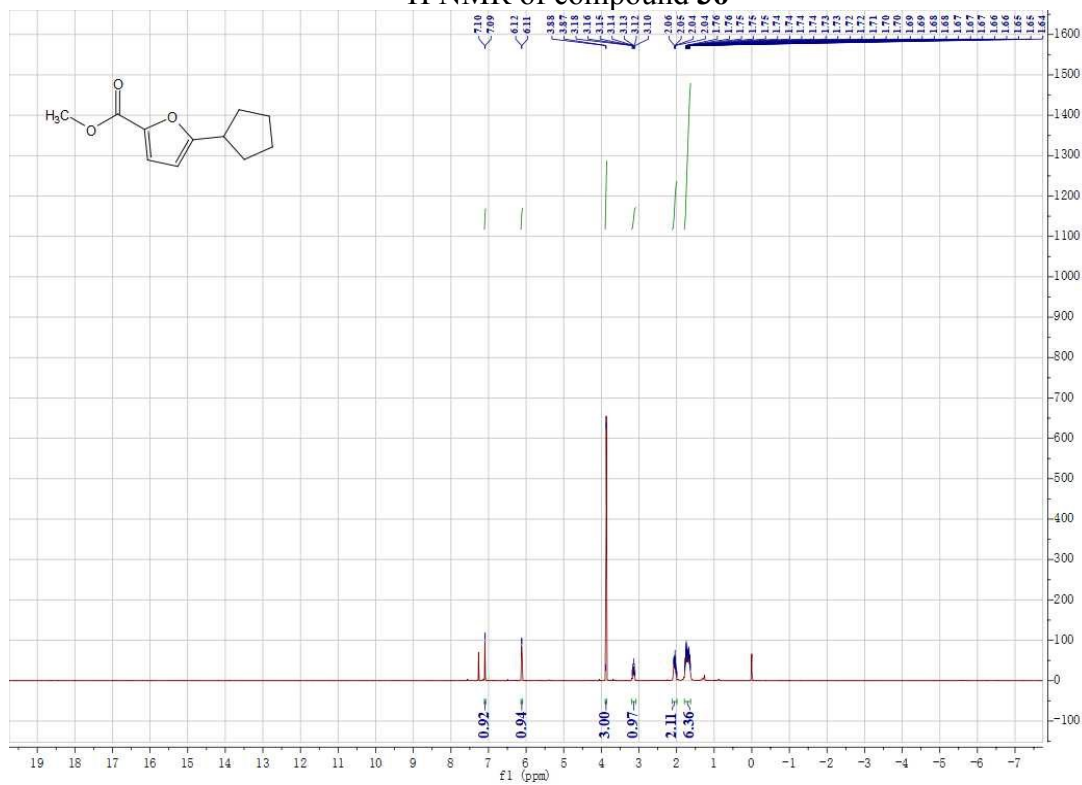

### <sup>13</sup>C NMR of compound **30**

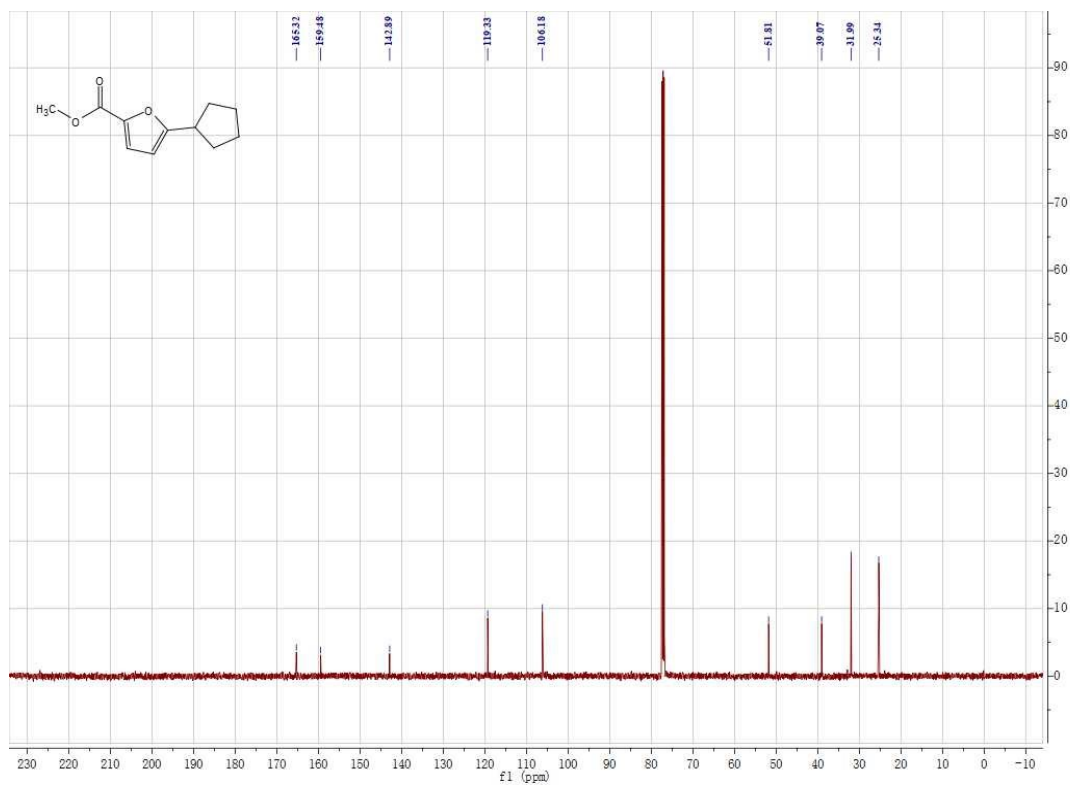

### <sup>1</sup>H NMR of compound 3p

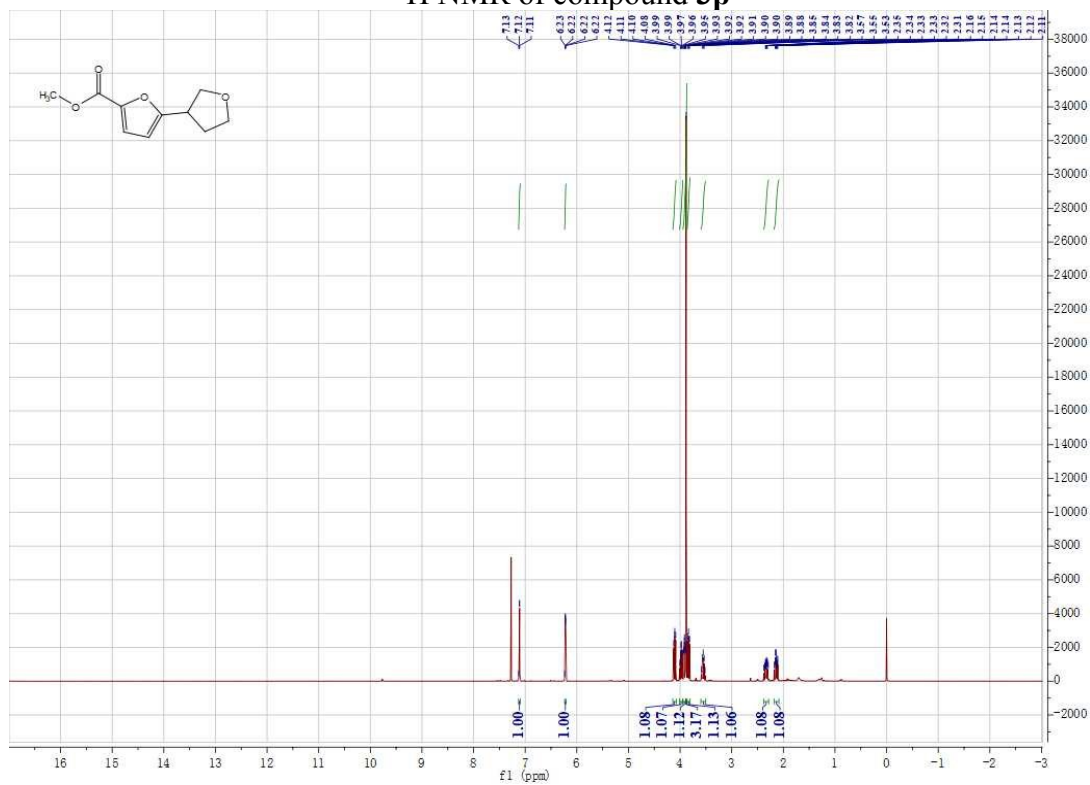

### <sup>13</sup>C NMR of compound 3p

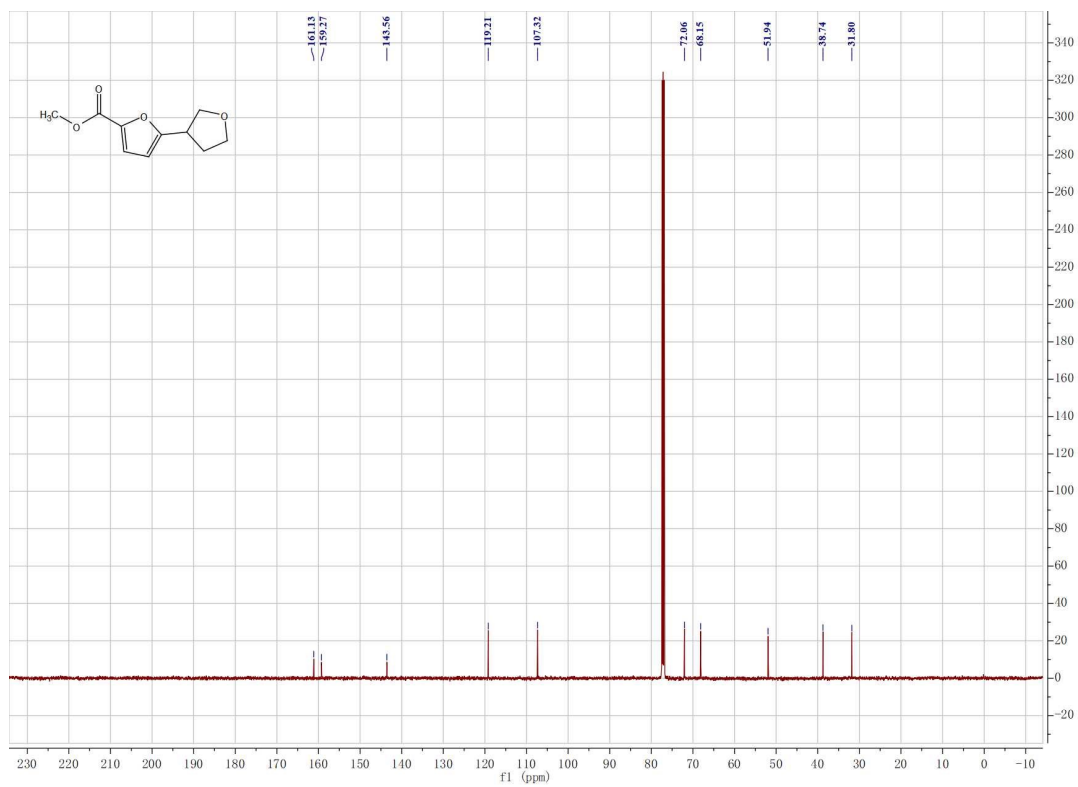

### <sup>1</sup>H NMR of compound 3q

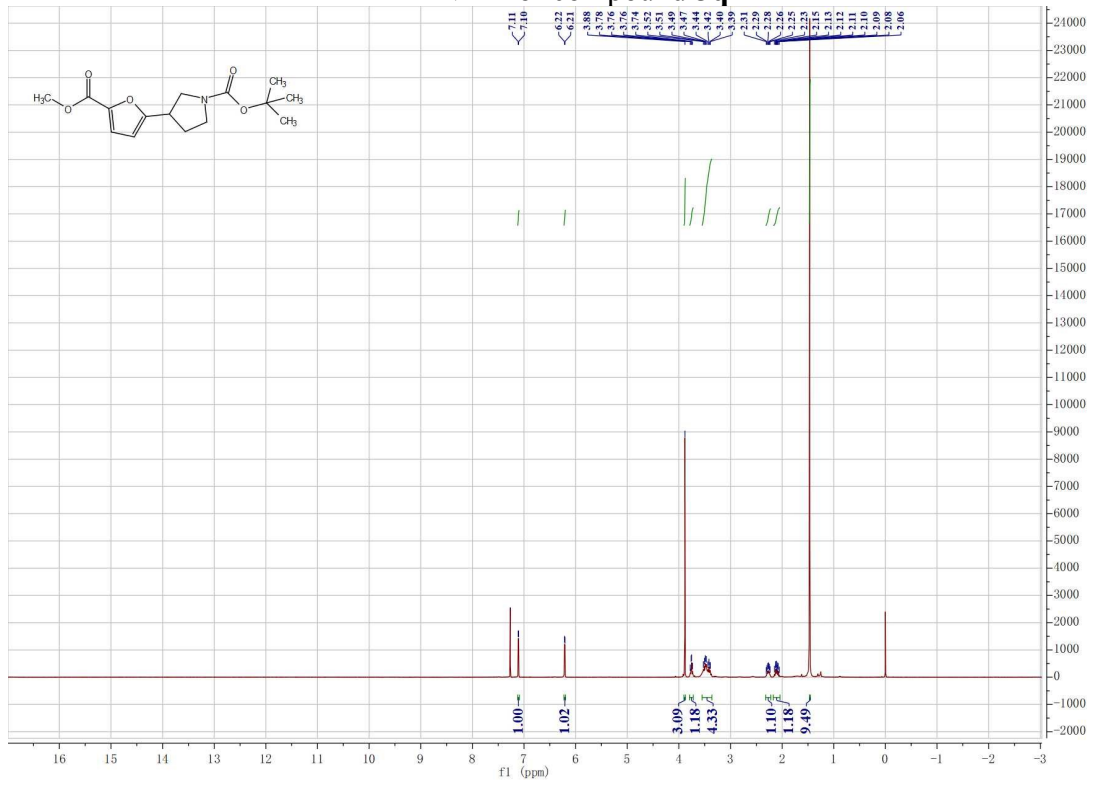

### <sup>13</sup>C NMR of compound 3q

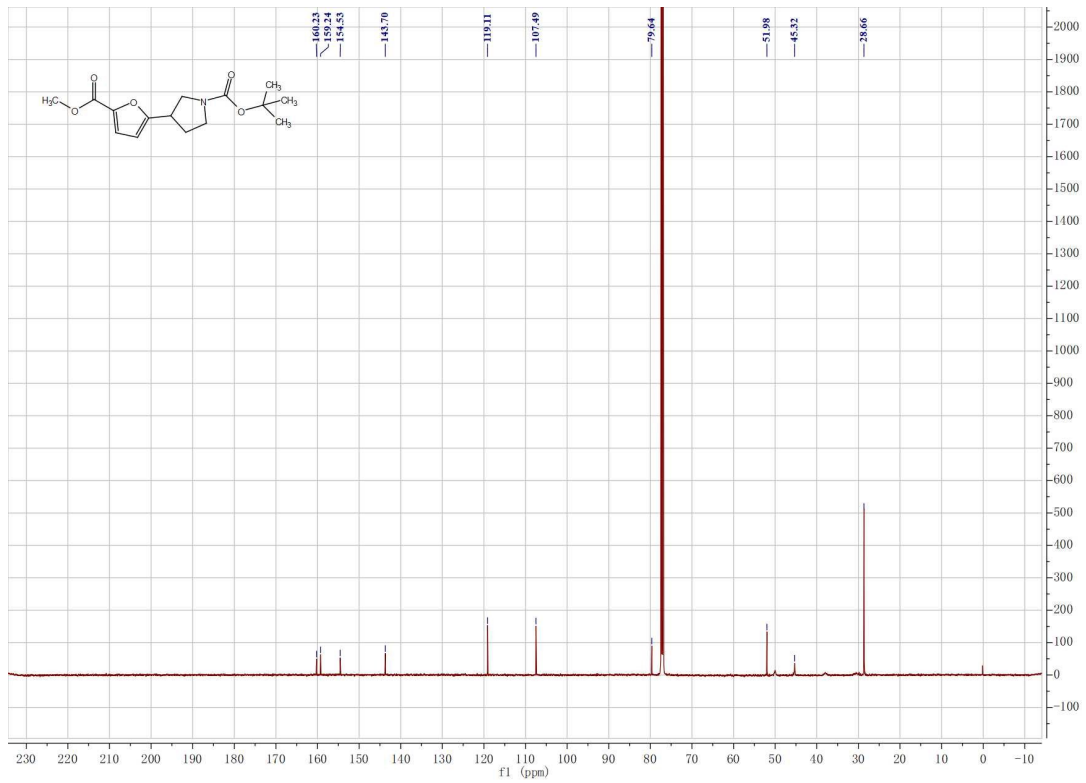

### $^1\text{H}$ NMR of compound **3r**

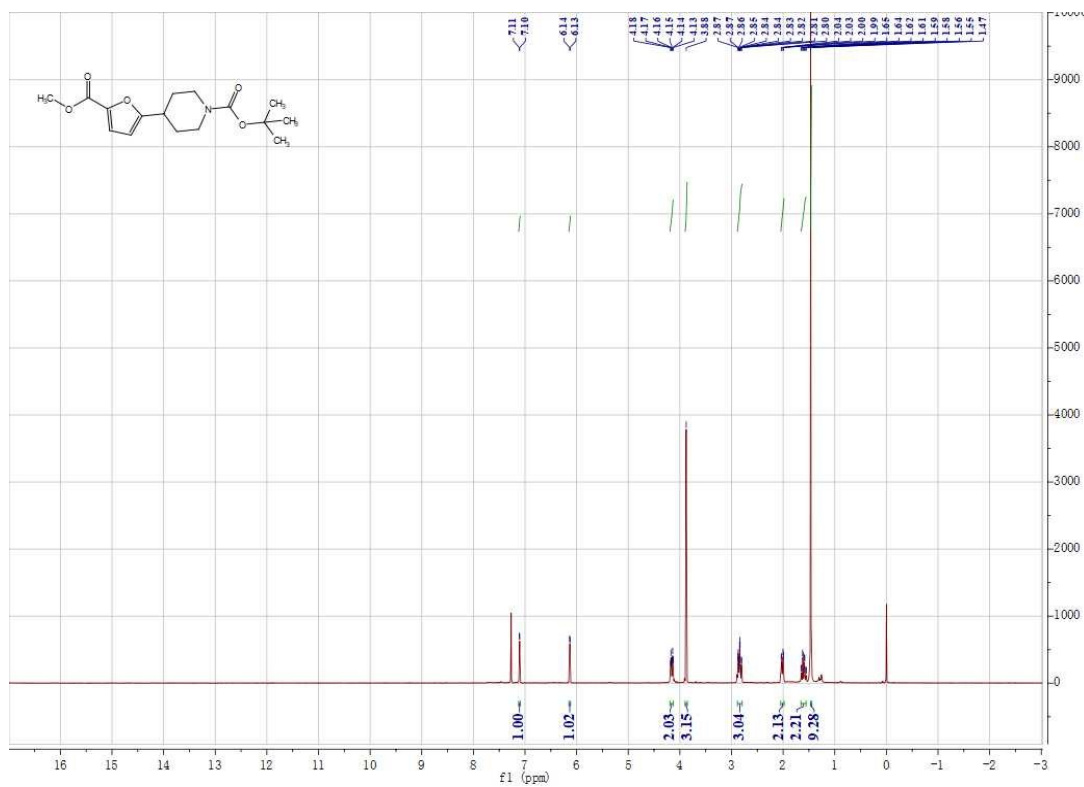

### $^{13}\text{C}$ NMR of compound **3r**

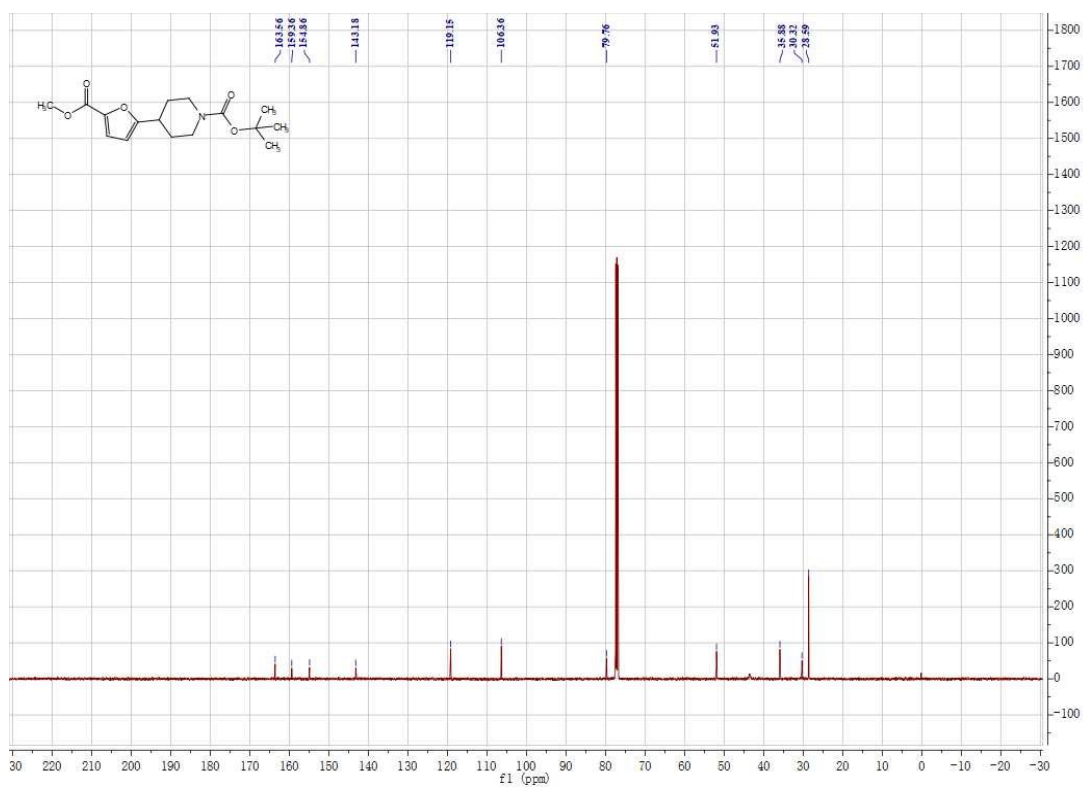

### $^1\text{H}$ NMR of compound 3s

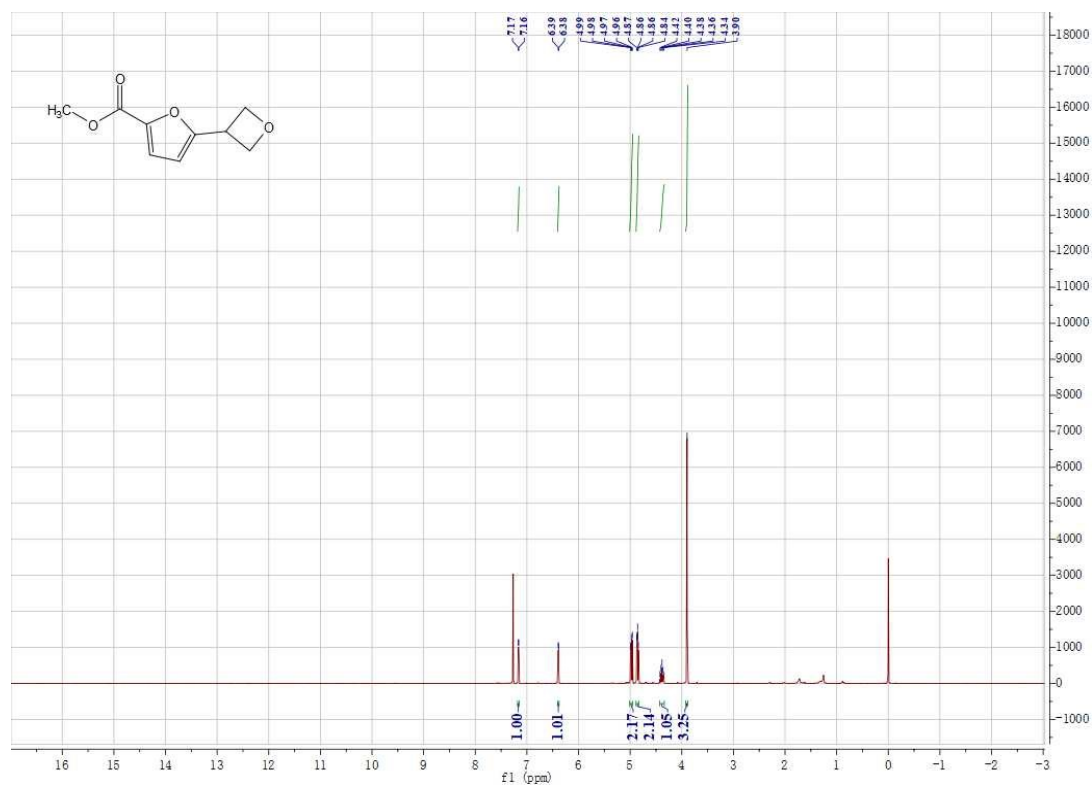

### $^{13}\text{C}$ NMR spectrum of compound 3s

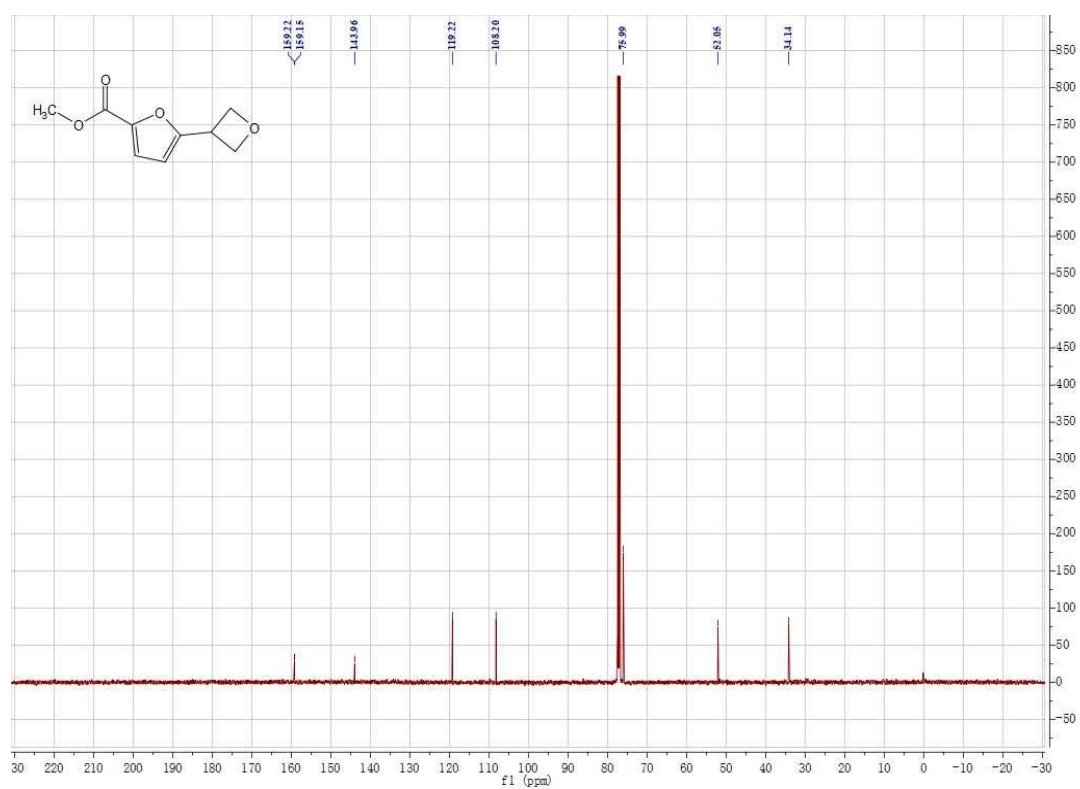

### $^1\text{H}$ NMR of compound **3t**

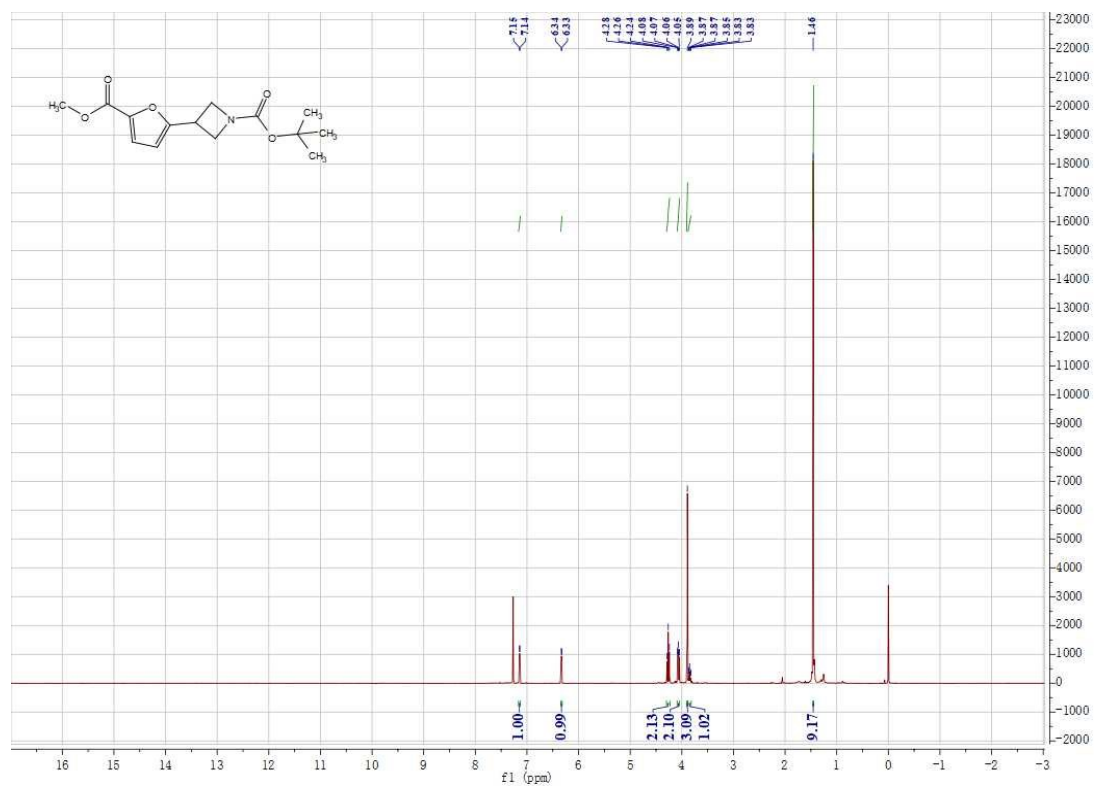

### $^{13}\text{C}$ NMR of compound **3t**

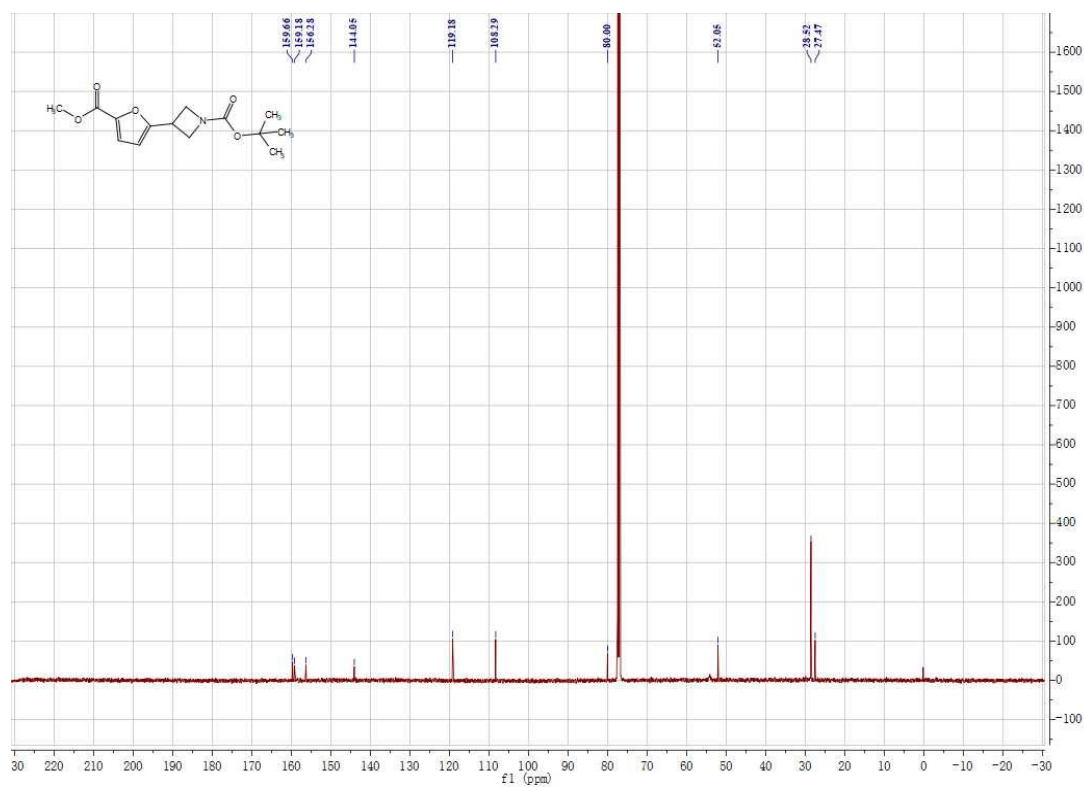

<sup>1</sup>H NMR of compound **3u**

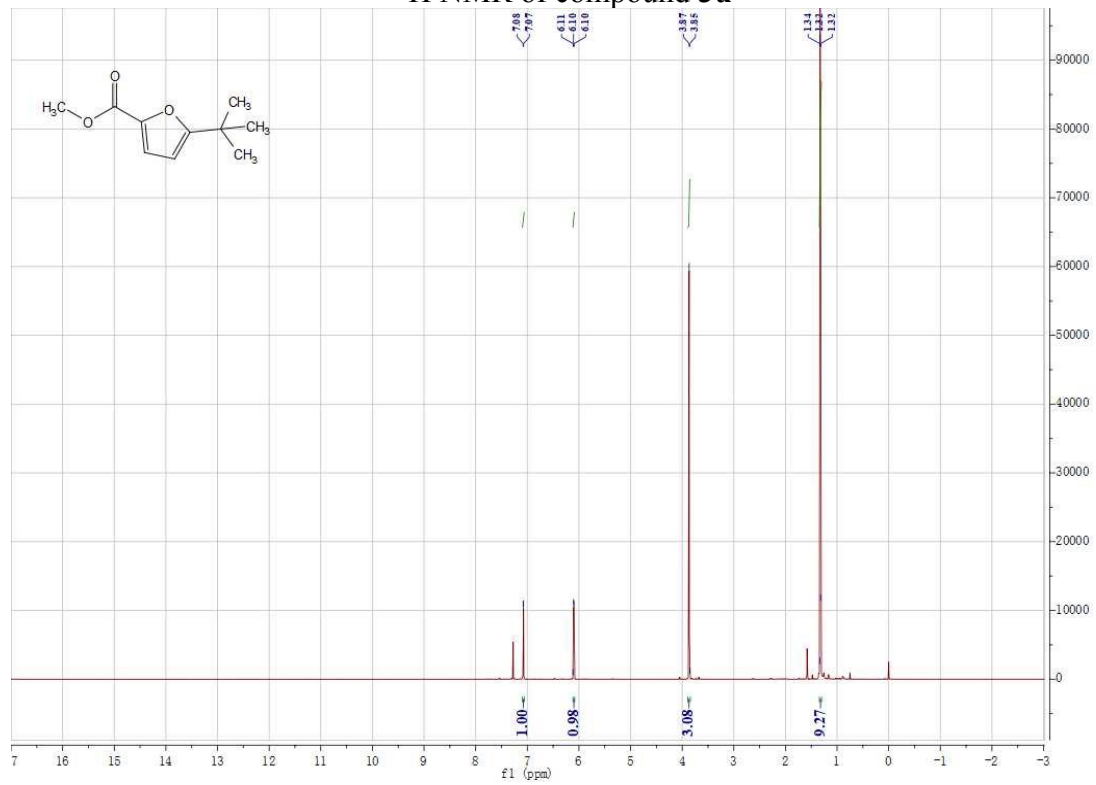

<sup>13</sup>C NMR of compound **3u**

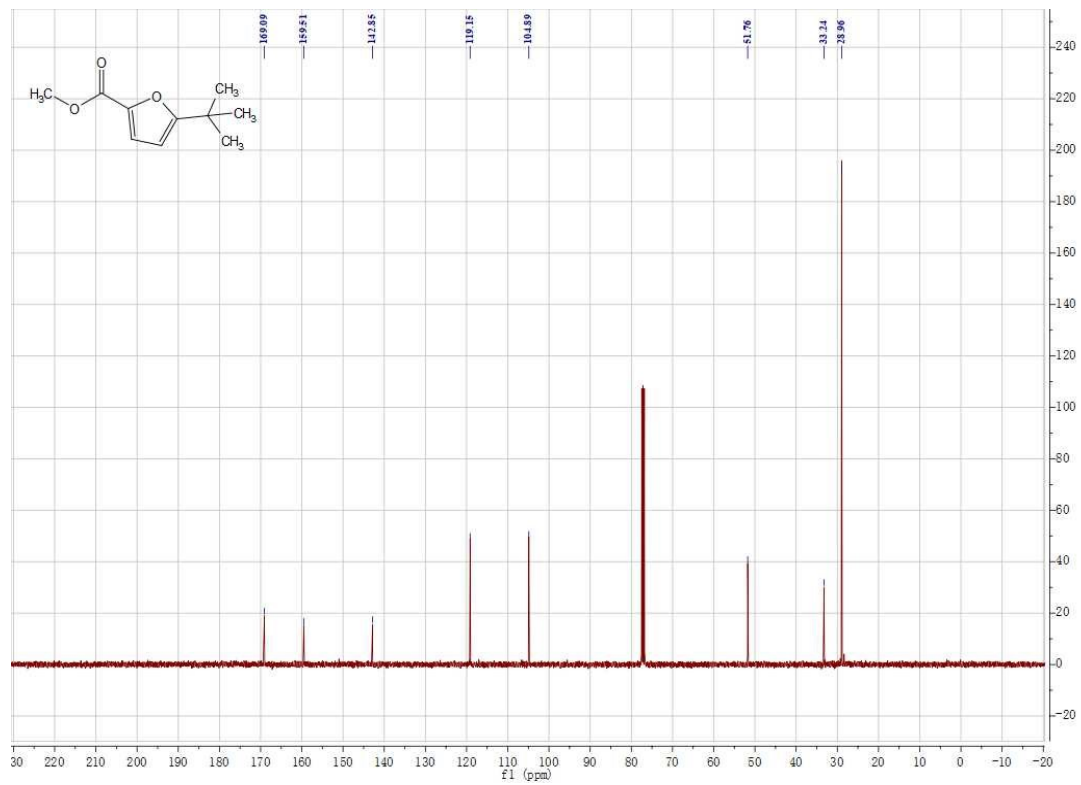

### <sup>1</sup>H NMR of compound **3v**

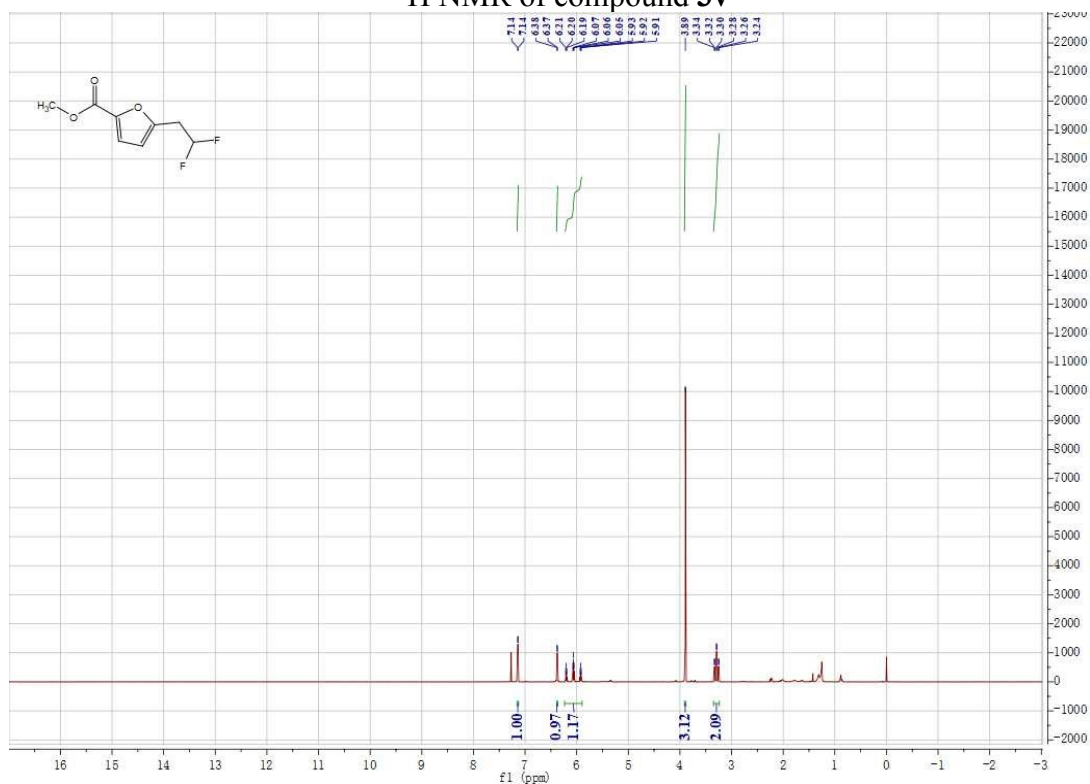

### <sup>13</sup>C NMR of compound **3v**

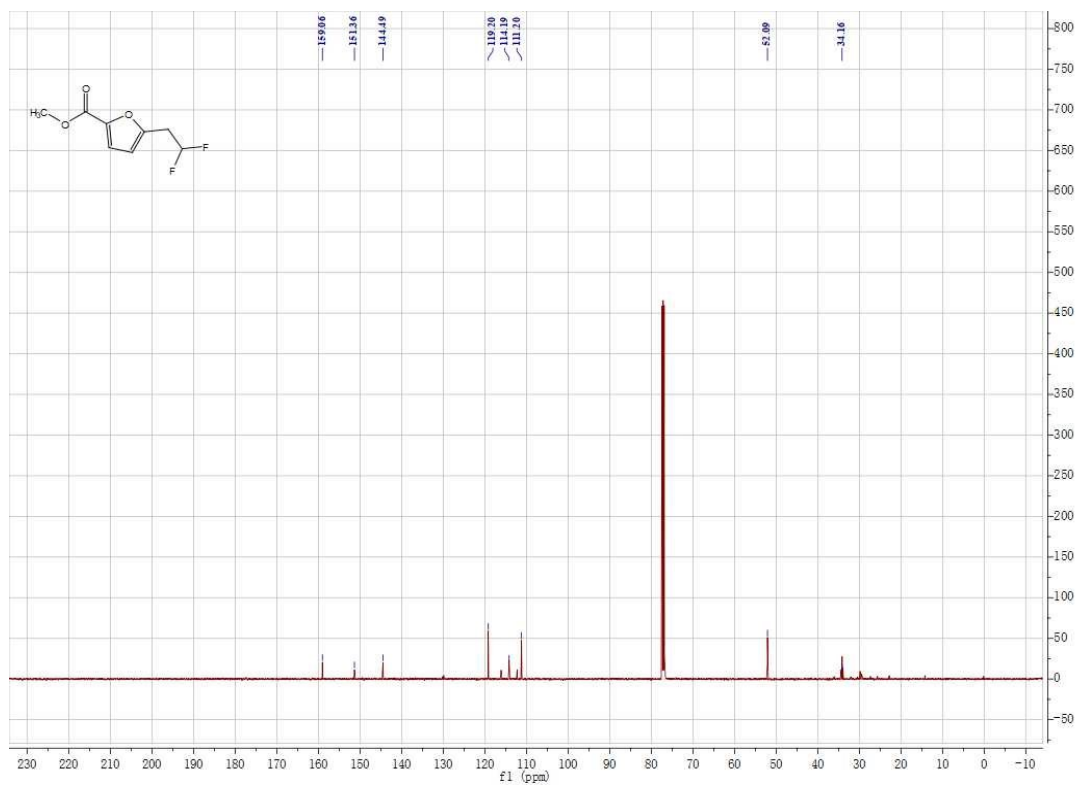



### $^1\text{H}$ NMR of compound **3w**

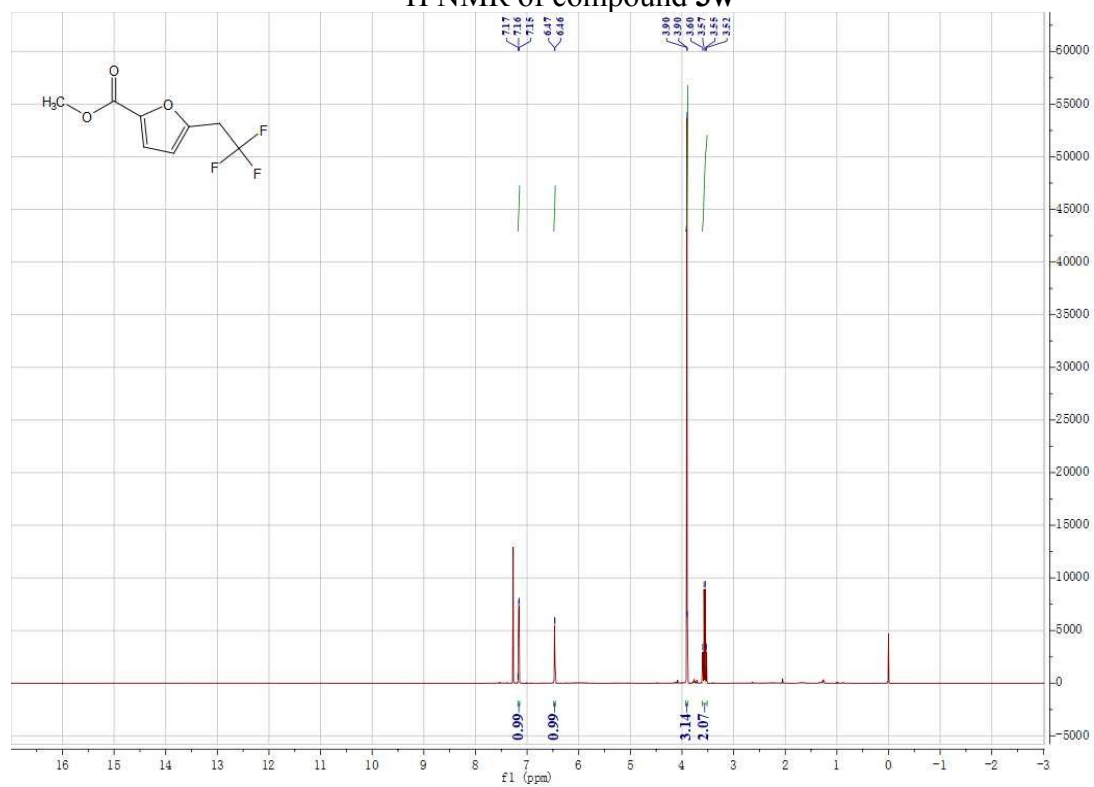

### $^{13}\text{C}$ NMR of compound **3w**

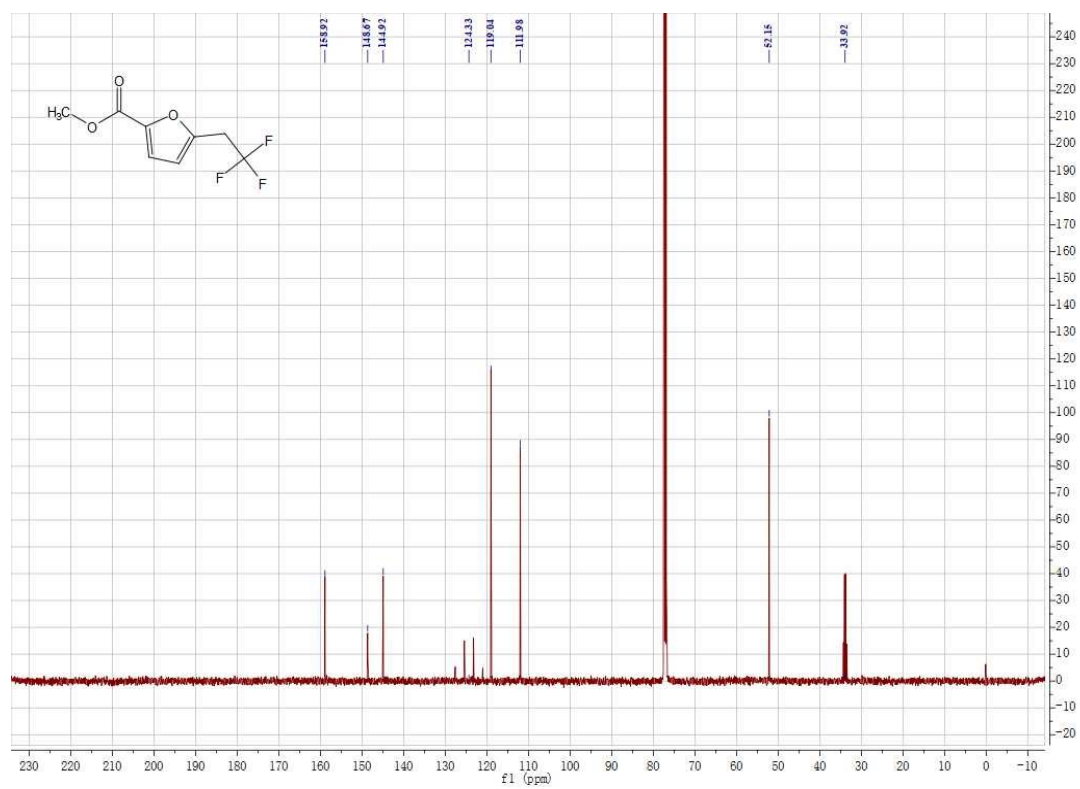

### <sup>1</sup>H NMR of compound 3x

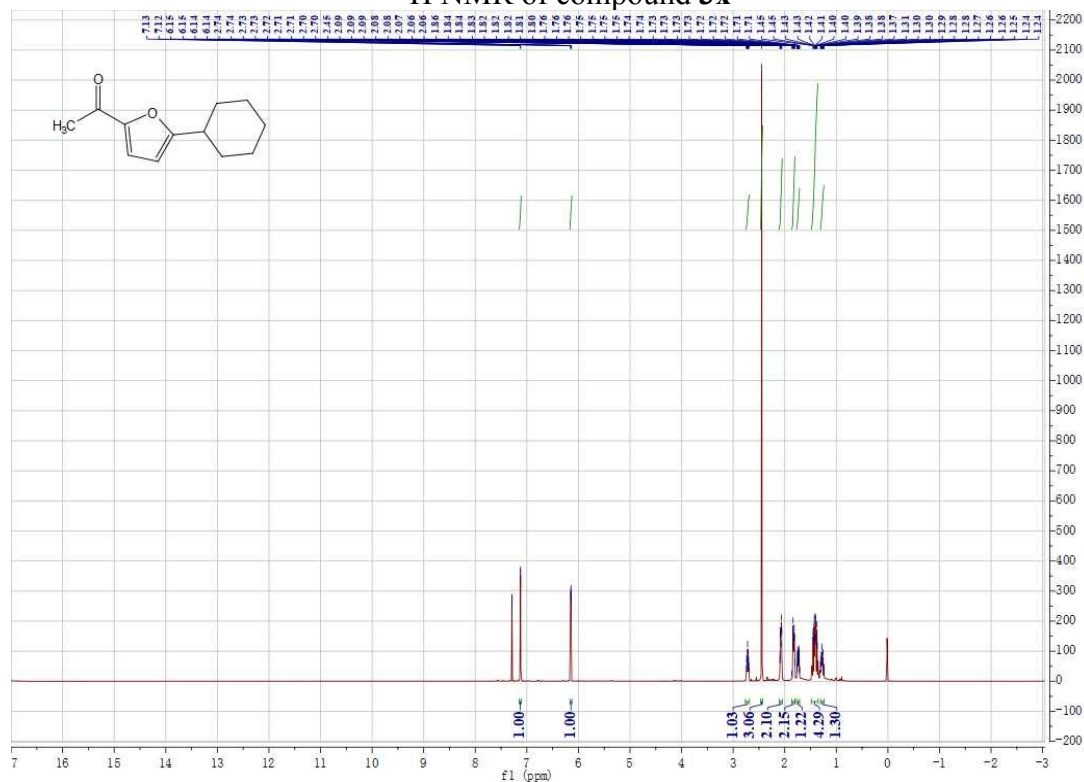

### <sup>13</sup>C NMR of compound 3x

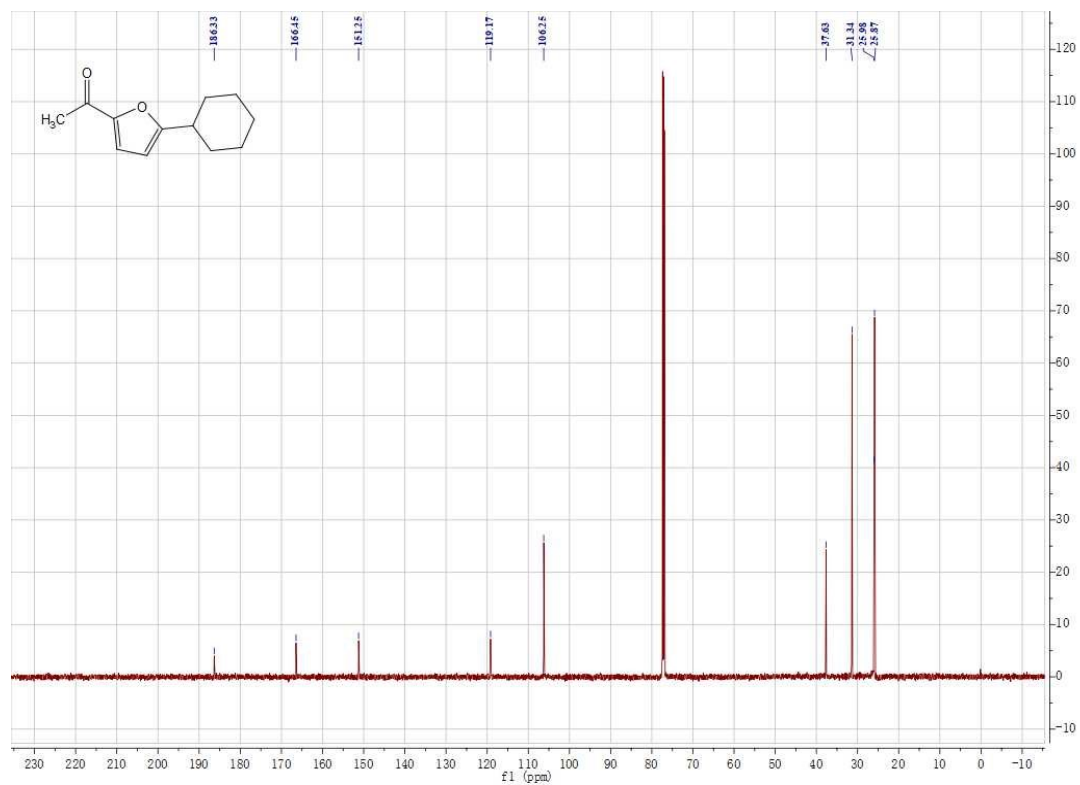

### <sup>1</sup>H NMR of compound **3y**

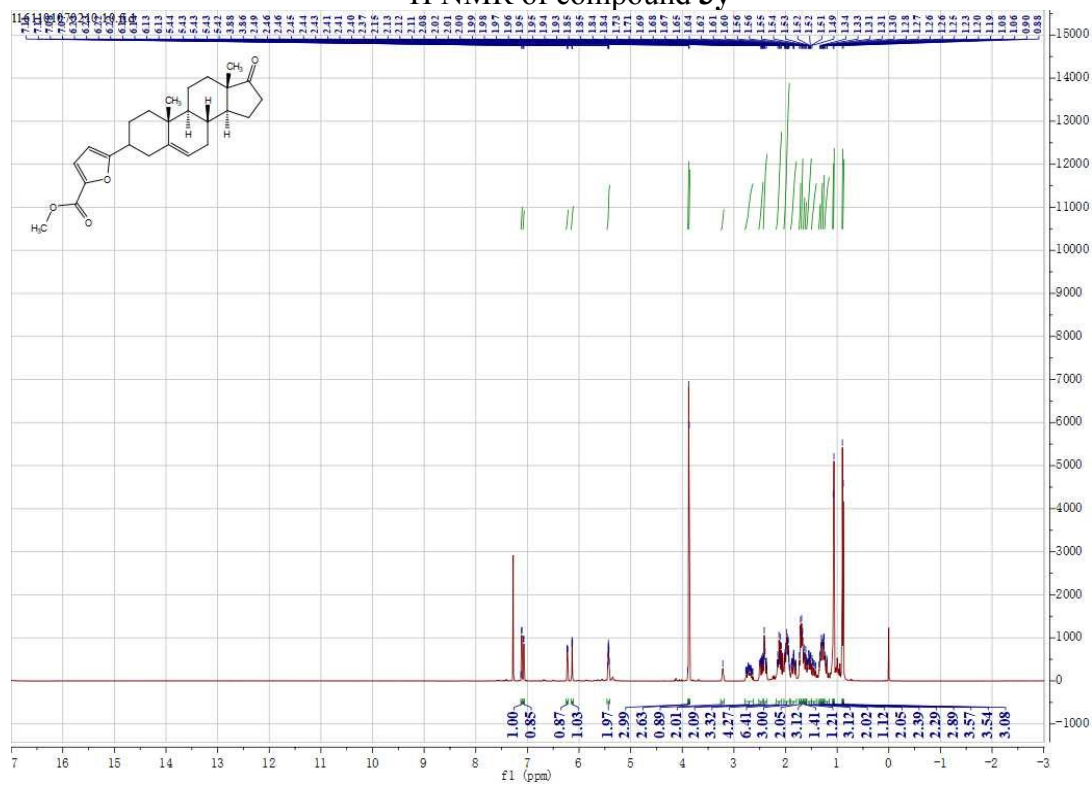

### <sup>13</sup>C NMR of compound **3y**

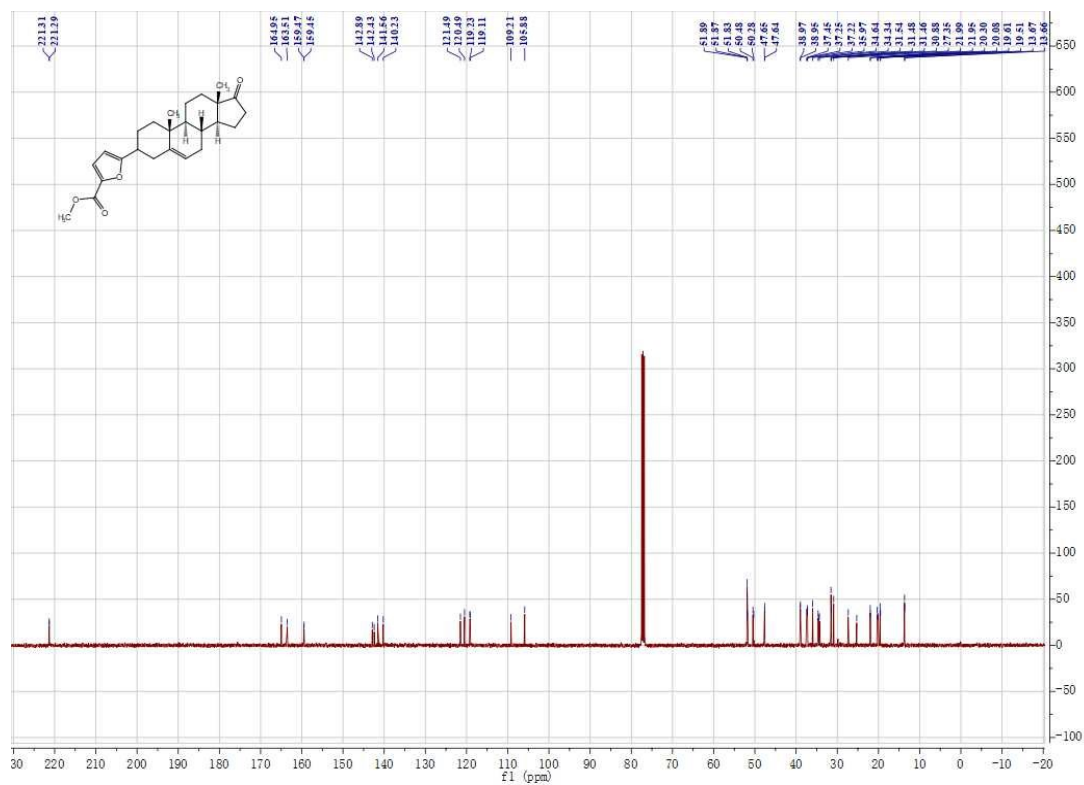

Supplement: d1ra01522b1.pdf [file d1ra01522b1.pdf]
